# Supplementary material for: Towards Subject-Specific Strength Training Design through Predictive Use of Musculoskeletal Models
Source: Appl Bionics Biomech. 2018 Mar 19;2018:9721079. doi: 10.1155/2018/9721079 (PMC5896361; doi:10.1155/2018/9721079)
Supplement: Supplementary Materials — The MATLAB code to generate the velocity profile as well as all the OpenSim files is available here http://www.movement.ethz.ch/data-repository.html. [file 9721079.f1.zip]

Archive with 46 entries (37 files):
- __MACOSX/Suplementary Material Paper/
- __MACOSX/Suplementary Material Paper/._code velocity profile.m
- __MACOSX/Suplementary Material Paper/._Opensim models
- __MACOSX/Suplementary Material Paper/._Opensim setup files
- __MACOSX/Suplementary Material Paper/Opensim models/
- __MACOSX/Suplementary Material Paper/Opensim models/._Arnoldetal2010_2Legs_Default_v2.1_Thelen_movement_add__abd_hip_position_ext_rot.osim
- __MACOSX/Suplementary Material Paper/Opensim models/._Arnoldetal2010_2Legs_Default_v2.1_Thelen_movement_add__abd_hip_position_int_rot.osim
- __MACOSX/Suplementary Material Paper/Opensim models/._Arnoldetal2010_2Legs_Default_v2.1_Thelen_movement_add__abd_hip_position_neutral.osim
- __MACOSX/Suplementary Material Paper/Opensim models/._Arnoldetal2010_2Legs_Default_v2.1_Thelen_movement_flex_ext_hip_position_ext_rot.osim
- __MACOSX/Suplementary Material Paper/Opensim models/._Arnoldetal2010_2Legs_Default_v2.1_Thelen_movement_flex_ext_hip_position_int_rot.osim
- __MACOSX/Suplementary Material Paper/Opensim models/._Arnoldetal2010_2Legs_Default_v2.1_Thelen_movement_flex_ext_hip_position_neutral.osim
- __MACOSX/Suplementary Material Paper/Opensim setup files/
- __MACOSX/Suplementary Material Paper/Opensim setup files/._ext_f_setups
- __MACOSX/Suplementary Material Paper/Opensim setup files/._ID_setups
- __MACOSX/Suplementary Material Paper/Opensim setup files/._kinematik_cable_add__abd_neutral.mot
- __MACOSX/Suplementary Material Paper/Opensim setup files/._kinematik_cable_flex_ext_neutral.mot
- __MACOSX/Suplementary Material Paper/Opensim setup files/._Read me.txt
- __MACOSX/Suplementary Material Paper/Opensim setup files/._SO_setups
- __MACOSX/Suplementary Material Paper/Opensim setup files/ext_f_setups/
- __MACOSX/Suplementary Material Paper/Opensim setup files/ext_f_setups/._setup_ext_force_add__abd.xml
- __MACOSX/Suplementary Material Paper/Opensim setup files/ext_f_setups/._setup_ext_force_flex_ext.xml
- __MACOSX/Suplementary Material Paper/Opensim setup files/ID_setups/
- __MACOSX/Suplementary Material Paper/Opensim setup files/ID_setups/._setup_ID_add__abd.xml
- __MACOSX/Suplementary Material Paper/Opensim setup files/ID_setups/._setup_ID_flex_ext.xml
- __MACOSX/Suplementary Material Paper/Opensim setup files/SO_setups/
- __MACOSX/Suplementary Material Paper/Opensim setup files/SO_setups/._setup_SO_add__abd.xml
- __MACOSX/Suplementary Material Paper/Opensim setup files/SO_setups/._setup_SO_flex_ext.xml
- code velocity profile.m
- Opensim models/Arnoldetal2010_2Legs_Default_v2.1_Thelen_movement_add__abd_hip_position_ext_rot.osim
- Opensim models/Arnoldetal2010_2Legs_Default_v2.1_Thelen_movement_add__abd_hip_position_int_rot.osim
- Opensim models/Arnoldetal2010_2Legs_Default_v2.1_Thelen_movement_add__abd_hip_position_neutral.osim
- Opensim models/Arnoldetal2010_2Legs_Default_v2.1_Thelen_movement_flex_ext_hip_position_ext_rot.osim
- Opensim models/Arnoldetal2010_2Legs_Default_v2.1_Thelen_movement_flex_ext_hip_position_int_rot.osim
- Opensim models/Arnoldetal2010_2Legs_Default_v2.1_Thelen_movement_flex_ext_hip_position_neutral.osim
- Opensim setup files/ext_f_setups/
- Opensim setup files/ext_f_setups/setup_ext_force_add__abd.xml
- Opensim setup files/ext_f_setups/setup_ext_force_flex_ext.xml
- Opensim setup files/ID_setups/
- Opensim setup files/ID_setups/setup_ID_add__abd.xml
- Opensim setup files/ID_setups/setup_ID_flex_ext.xml
- Opensim setup files/kinematik_cable_add__abd_neutral.mot
- Opensim setup files/kinematik_cable_flex_ext_neutral.mot
- Opensim setup files/Read me.txt
- Opensim setup files/SO_setups/
- Opensim setup files/SO_setups/setup_SO_add__abd.xml
- Opensim setup files/SO_setups/setup_SO_flex_ext.xml
