# Supplementary material for: Towards Subject-Specific Strength Training Design through Predictive Use of Musculoskeletal Models
Source: Appl Bionics Biomech. 2018 Mar 19;2018:9721079. doi: 10.1155/2018/9721079 (PMC5896361; doi:10.1155/2018/9721079)
Supplement: Supplementary Materials — The MATLAB code to generate the velocity profile as well as all the OpenSim files is available here http://www.movement.ethz.ch/data-repository.html. [file 9721079.f1.zip › Opensim setup files/ext_f_setups/setup_ext_force_flex_ext.xml]

<?xml version="1.0" encoding="utf-8"?>
<OpenSimDocument Version="30000">
   <ExternalLoads name="Ex2">
      <objects>
         <ExternalForce name="1D_force">
            <applied_to_body>cylinder</applied_to_body>
            <force_expressed_in_body>ground</force_expressed_in_body>
            <point_expressed_in_body>cylinder</point_expressed_in_body>
            <force_identifier>cylinder_force1_v</force_identifier>
            <point_identifier>cylinder_force1_p</point_identifier>
            <torque_identifier>cylinder_torque1_</torque_identifier>
            <data_source_name>kinematik_cable_flex_ext_neutral.mot</data_source_name>
         </ExternalForce>
      </objects>
      <groups/>
      <datafile>P:\Student\PluessM\Versuch\Versuch8_Arnold\Matlab_programme\full_motion\rot_angle_0_neutral_test_strength_scale\kinematik_cable_flex_ext_neutral.mot</datafile>
      <external_loads_model_kinematics_file/>
      <lowpass_cutoff_frequency_for_load_kinematics>-1</lowpass_cutoff_frequency_for_load_kinematics>
   </ExternalLoads>
</OpenSimDocument>
