# Supplementary material for: Towards Subject-Specific Strength Training Design through Predictive Use of Musculoskeletal Models
Source: Appl Bionics Biomech. 2018 Mar 19;2018:9721079. doi: 10.1155/2018/9721079 (PMC5896361; doi:10.1155/2018/9721079)
Supplement: Supplementary Materials — The MATLAB code to generate the velocity profile as well as all the OpenSim files is available here http://www.movement.ethz.ch/data-repository.html. [file 9721079.f1.zip › Opensim setup files/ID_setups/setup_ID_flex_ext.xml]

<?xml version="1.0" encoding="utf-8"?>
<OpenSimDocument Version="30000">
   <InverseDynamicsTool name="Arnoldetal2010_2Legs_Default_v2.1_Thelen_Rotational_Force_flex_ext_neutral.osim">
      <results_directory>P:\Student\PluessM\Versuch\Versuch8_Arnold\Matlab_programme\full_motion\rot_angle_0_neutral_test_strength_scale\ID_results</results_directory>
      <coordinates_file>P:\Student\PluessM\Versuch\Versuch8_Arnold\Matlab_programme\full_motion\rot_angle_0_neutral_test_strength_scale\kinematik_cable_flex_ext_neutral.mot</coordinates_file>
      <output_gen_force_file>inverse_dynamics_flex_ext.sto</output_gen_force_file>
      <input_directory/>
      <model_file>Unassigned</model_file>
      <time_range>0 6.28</time_range>
      <forces_to_exclude>Muscles</forces_to_exclude>
      <external_loads_file>P:\Student\PluessM\Versuch\Versuch8_Arnold\Matlab_programme\full_motion\rot_angle_0_neutral_test_strength_scale\ext_f_setups\setup_ext_force_flex_ext.xml</external_loads_file>
      <lowpass_cutoff_frequency_for_coordinates>6</lowpass_cutoff_frequency_for_coordinates>
      <joints_to_report_body_forces/>
      <output_body_forces_file>body_forces_at_joints_flex_ext.sto</output_body_forces_file>
   </InverseDynamicsTool>
</OpenSimDocument>
