# Supplementary material for: Towards Subject-Specific Strength Training Design through Predictive Use of Musculoskeletal Models
Source: Appl Bionics Biomech. 2018 Mar 19;2018:9721079. doi: 10.1155/2018/9721079 (PMC5896361; doi:10.1155/2018/9721079)
Supplement: Supplementary Materials — The MATLAB code to generate the velocity profile as well as all the OpenSim files is available here http://www.movement.ethz.ch/data-repository.html. [file 9721079.f1.zip › Opensim setup files/kinematik_cable_add__abd_neutral.mot]

kinematik_cable_add__abd_neutral.mot
version=1
nRows=315
nColumns=35
inDegrees=yes

Units are S.I. units(second, meters, Newtons,...)
Angles are in degrees.

endheader
time	pelvis_tilt	pelvis_list	pelvis_rotation	pelvis_tx	pelvis_ty	pelvis_tz	hip_flexion_r	hip_adduction_r	hip_rotation_r	knee_angle_r	knee_angle_r_beta	ankle_angle_r	subtalar_angle_r	mtp_angle_r	hip_flexion_l	hip_adduction_l	hip_rotation_l	knee_angle_l	knee_angle_l_beta	ankle_angle_l	subtalar_angle_l	mtp_angle_l	lumbar_extension	lumbar_bending	lumbar_rotation	cylinder_force1_vx	cylinder_force1_vy	cylinder_force1_vz	cylinder_force1_px	cylinder_force1_py	cylinder_force1_pz	cylinder_torque1_x	cylinder_torque1_y	cylinder_torque1_z	
0.000000	0.000000	0.000000	0.000000	0.000000	0.000000	0.000000	0.000000	-35.000000	0.000000	0.000000	0.000000	0.000000	0.000000	0.000000	0.000000	0.000000	0.000000	0.000000	0.000000	0.000000	0.000000	0.000000	0.000000	0.000000	0.000000	0.000000	0.000000	-100.000000	0.000000	0.000000	0.000000	0.000000	0.000000	0.000000	
0.010000	0.000000	0.000000	0.000000	0.000000	0.000000	0.000000	0.000000	-34.996000	0.000000	0.000000	0.000000	0.000000	0.000000	0.000000	0.000000	0.000000	0.000000	0.000000	0.000000	0.000000	0.000000	0.000000	0.000000	0.000000	0.000000	0.000000	0.000000	-100.000000	0.000000	0.000000	0.000000	0.000000	0.000000	0.000000	
0.020000	0.000000	0.000000	0.000000	0.000000	0.000000	0.000000	0.000000	-34.984003	0.000000	0.000000	0.000000	0.000000	0.000000	0.000000	0.000000	0.000000	0.000000	0.000000	0.000000	0.000000	0.000000	0.000000	0.000000	0.000000	0.000000	0.000000	0.000000	-100.000000	0.000000	0.000000	0.000000	0.000000	0.000000	0.000000	
0.030000	0.000000	0.000000	0.000000	0.000000	0.000000	0.000000	0.000000	-34.964012	0.000000	0.000000	0.000000	0.000000	0.000000	0.000000	0.000000	0.000000	0.000000	0.000000	0.000000	0.000000	0.000000	0.000000	0.000000	0.000000	0.000000	0.000000	0.000000	-100.000000	0.000000	0.000000	0.000000	0.000000	0.000000	0.000000	
0.040000	0.000000	0.000000	0.000000	0.000000	0.000000	0.000000	0.000000	-34.936036	0.000000	0.000000	0.000000	0.000000	0.000000	0.000000	0.000000	0.000000	0.000000	0.000000	0.000000	0.000000	0.000000	0.000000	0.000000	0.000000	0.000000	0.000000	0.000000	-100.000000	0.000000	0.000000	0.000000	0.000000	0.000000	0.000000	
0.050000	0.000000	0.000000	0.000000	0.000000	0.000000	0.000000	0.000000	-34.900087	0.000000	0.000000	0.000000	0.000000	0.000000	0.000000	0.000000	0.000000	0.000000	0.000000	0.000000	0.000000	0.000000	0.000000	0.000000	0.000000	0.000000	0.000000	0.000000	-100.000000	0.000000	0.000000	0.000000	0.000000	0.000000	0.000000	
0.060000	0.000000	0.000000	0.000000	0.000000	0.000000	0.000000	0.000000	-34.856178	0.000000	0.000000	0.000000	0.000000	0.000000	0.000000	0.000000	0.000000	0.000000	0.000000	0.000000	0.000000	0.000000	0.000000	0.000000	0.000000	0.000000	0.000000	0.000000	-100.000000	0.000000	0.000000	0.000000	0.000000	0.000000	0.000000	
0.070000	0.000000	0.000000	0.000000	0.000000	0.000000	0.000000	0.000000	-34.804326	0.000000	0.000000	0.000000	0.000000	0.000000	0.000000	0.000000	0.000000	0.000000	0.000000	0.000000	0.000000	0.000000	0.000000	0.000000	0.000000	0.000000	0.000000	0.000000	-100.000000	0.000000	0.000000	0.000000	0.000000	0.000000	0.000000	
0.080000	0.000000	0.000000	0.000000	0.000000	0.000000	0.000000	0.000000	-34.744554	0.000000	0.000000	0.000000	0.000000	0.000000	0.000000	0.000000	0.000000	0.000000	0.000000	0.000000	0.000000	0.000000	0.000000	0.000000	0.000000	0.000000	0.000000	0.000000	-100.000000	0.000000	0.000000	0.000000	0.000000	0.000000	0.000000	
0.090000	0.000000	0.000000	0.000000	0.000000	0.000000	0.000000	0.000000	-34.676885	0.000000	0.000000	0.000000	0.000000	0.000000	0.000000	0.000000	0.000000	0.000000	0.000000	0.000000	0.000000	0.000000	0.000000	0.000000	0.000000	0.000000	0.000000	0.000000	-100.000000	0.000000	0.000000	0.000000	0.000000	0.000000	0.000000	
0.100000	0.000000	0.000000	0.000000	0.000000	0.000000	0.000000	0.000000	-34.601345	0.000000	0.000000	0.000000	0.000000	0.000000	0.000000	0.000000	0.000000	0.000000	0.000000	0.000000	0.000000	0.000000	0.000000	0.000000	0.000000	0.000000	0.000000	0.000000	-100.000000	0.000000	0.000000	0.000000	0.000000	0.000000	0.000000	
0.110000	0.000000	0.000000	0.000000	0.000000	0.000000	0.000000	0.000000	-34.517965	0.000000	0.000000	0.000000	0.000000	0.000000	0.000000	0.000000	0.000000	0.000000	0.000000	0.000000	0.000000	0.000000	0.000000	0.000000	0.000000	0.000000	0.000000	0.000000	-100.000000	0.000000	0.000000	0.000000	0.000000	0.000000	0.000000	
0.120000	0.000000	0.000000	0.000000	0.000000	0.000000	0.000000	0.000000	-34.426779	0.000000	0.000000	0.000000	0.000000	0.000000	0.000000	0.000000	0.000000	0.000000	0.000000	0.000000	0.000000	0.000000	0.000000	0.000000	0.000000	0.000000	0.000000	0.000000	-100.000000	0.000000	0.000000	0.000000	0.000000	0.000000	0.000000	
0.130000	0.000000	0.000000	0.000000	0.000000	0.000000	0.000000	0.000000	-34.327822	0.000000	0.000000	0.000000	0.000000	0.000000	0.000000	0.000000	0.000000	0.000000	0.000000	0.000000	0.000000	0.000000	0.000000	0.000000	0.000000	0.000000	0.000000	0.000000	-100.000000	0.000000	0.000000	0.000000	0.000000	0.000000	0.000000	
0.140000	0.000000	0.000000	0.000000	0.000000	0.000000	0.000000	0.000000	-34.221135	0.000000	0.000000	0.000000	0.000000	0.000000	0.000000	0.000000	0.000000	0.000000	0.000000	0.000000	0.000000	0.000000	0.000000	0.000000	0.000000	0.000000	0.000000	0.000000	-100.000000	0.000000	0.000000	0.000000	0.000000	0.000000	0.000000	
0.150000	0.000000	0.000000	0.000000	0.000000	0.000000	0.000000	0.000000	-34.106760	0.000000	0.000000	0.000000	0.000000	0.000000	0.000000	0.000000	0.000000	0.000000	0.000000	0.000000	0.000000	0.000000	0.000000	0.000000	0.000000	0.000000	0.000000	0.000000	-100.000000	0.000000	0.000000	0.000000	0.000000	0.000000	0.000000	
0.160000	0.000000	0.000000	0.000000	0.000000	0.000000	0.000000	0.000000	-33.984742	0.000000	0.000000	0.000000	0.000000	0.000000	0.000000	0.000000	0.000000	0.000000	0.000000	0.000000	0.000000	0.000000	0.000000	0.000000	0.000000	0.000000	0.000000	0.000000	-100.000000	0.000000	0.000000	0.000000	0.000000	0.000000	0.000000	
0.170000	0.000000	0.000000	0.000000	0.000000	0.000000	0.000000	0.000000	-33.855131	0.000000	0.000000	0.000000	0.000000	0.000000	0.000000	0.000000	0.000000	0.000000	0.000000	0.000000	0.000000	0.000000	0.000000	0.000000	0.000000	0.000000	0.000000	0.000000	-100.000000	0.000000	0.000000	0.000000	0.000000	0.000000	0.000000	
0.180000	0.000000	0.000000	0.000000	0.000000	0.000000	0.000000	0.000000	-33.717979	0.000000	0.000000	0.000000	0.000000	0.000000	0.000000	0.000000	0.000000	0.000000	0.000000	0.000000	0.000000	0.000000	0.000000	0.000000	0.000000	0.000000	0.000000	0.000000	-100.000000	0.000000	0.000000	0.000000	0.000000	0.000000	0.000000	
0.190000	0.000000	0.000000	0.000000	0.000000	0.000000	0.000000	0.000000	-33.573340	0.000000	0.000000	0.000000	0.000000	0.000000	0.000000	0.000000	0.000000	0.000000	0.000000	0.000000	0.000000	0.000000	0.000000	0.000000	0.000000	0.000000	0.000000	0.000000	-100.000000	0.000000	0.000000	0.000000	0.000000	0.000000	0.000000	
0.200000	0.000000	0.000000	0.000000	0.000000	0.000000	0.000000	0.000000	-33.421273	0.000000	0.000000	0.000000	0.000000	0.000000	0.000000	0.000000	0.000000	0.000000	0.000000	0.000000	0.000000	0.000000	0.000000	0.000000	0.000000	0.000000	0.000000	0.000000	-100.000000	0.000000	0.000000	0.000000	0.000000	0.000000	0.000000	
0.210000	0.000000	0.000000	0.000000	0.000000	0.000000	0.000000	0.000000	-33.261837	0.000000	0.000000	0.000000	0.000000	0.000000	0.000000	0.000000	0.000000	0.000000	0.000000	0.000000	0.000000	0.000000	0.000000	0.000000	0.000000	0.000000	0.000000	0.000000	-100.000000	0.000000	0.000000	0.000000	0.000000	0.000000	0.000000	
0.220000	0.000000	0.000000	0.000000	0.000000	0.000000	0.000000	0.000000	-33.095097	0.000000	0.000000	0.000000	0.000000	0.000000	0.000000	0.000000	0.000000	0.000000	0.000000	0.000000	0.000000	0.000000	0.000000	0.000000	0.000000	0.000000	0.000000	0.000000	-100.000000	0.000000	0.000000	0.000000	0.000000	0.000000	0.000000	
0.230000	0.000000	0.000000	0.000000	0.000000	0.000000	0.000000	0.000000	-32.921119	0.000000	0.000000	0.000000	0.000000	0.000000	0.000000	0.000000	0.000000	0.000000	0.000000	0.000000	0.000000	0.000000	0.000000	0.000000	0.000000	0.000000	0.000000	0.000000	-100.000000	0.000000	0.000000	0.000000	0.000000	0.000000	0.000000	
0.240000	0.000000	0.000000	0.000000	0.000000	0.000000	0.000000	0.000000	-32.739974	0.000000	0.000000	0.000000	0.000000	0.000000	0.000000	0.000000	0.000000	0.000000	0.000000	0.000000	0.000000	0.000000	0.000000	0.000000	0.000000	0.000000	0.000000	0.000000	-100.000000	0.000000	0.000000	0.000000	0.000000	0.000000	0.000000	
0.250000	0.000000	0.000000	0.000000	0.000000	0.000000	0.000000	0.000000	-32.551733	0.000000	0.000000	0.000000	0.000000	0.000000	0.000000	0.000000	0.000000	0.000000	0.000000	0.000000	0.000000	0.000000	0.000000	0.000000	0.000000	0.000000	0.000000	0.000000	-100.000000	0.000000	0.000000	0.000000	0.000000	0.000000	0.000000	
0.260000	0.000000	0.000000	0.000000	0.000000	0.000000	0.000000	0.000000	-32.356472	0.000000	0.000000	0.000000	0.000000	0.000000	0.000000	0.000000	0.000000	0.000000	0.000000	0.000000	0.000000	0.000000	0.000000	0.000000	0.000000	0.000000	0.000000	0.000000	-100.000000	0.000000	0.000000	0.000000	0.000000	0.000000	0.000000	
0.270000	0.000000	0.000000	0.000000	0.000000	0.000000	0.000000	0.000000	-32.154268	0.000000	0.000000	0.000000	0.000000	0.000000	0.000000	0.000000	0.000000	0.000000	0.000000	0.000000	0.000000	0.000000	0.000000	0.000000	0.000000	0.000000	0.000000	0.000000	-100.000000	0.000000	0.000000	0.000000	0.000000	0.000000	0.000000	
0.280000	0.000000	0.000000	0.000000	0.000000	0.000000	0.000000	0.000000	-31.945204	0.000000	0.000000	0.000000	0.000000	0.000000	0.000000	0.000000	0.000000	0.000000	0.000000	0.000000	0.000000	0.000000	0.000000	0.000000	0.000000	0.000000	0.000000	0.000000	-100.000000	0.000000	0.000000	0.000000	0.000000	0.000000	0.000000	
0.290000	0.000000	0.000000	0.000000	0.000000	0.000000	0.000000	0.000000	-31.729362	0.000000	0.000000	0.000000	0.000000	0.000000	0.000000	0.000000	0.000000	0.000000	0.000000	0.000000	0.000000	0.000000	0.000000	0.000000	0.000000	0.000000	0.000000	0.000000	-100.000000	0.000000	0.000000	0.000000	0.000000	0.000000	0.000000	
0.300000	0.000000	0.000000	0.000000	0.000000	0.000000	0.000000	0.000000	-31.506829	0.000000	0.000000	0.000000	0.000000	0.000000	0.000000	0.000000	0.000000	0.000000	0.000000	0.000000	0.000000	0.000000	0.000000	0.000000	0.000000	0.000000	0.000000	0.000000	-100.000000	0.000000	0.000000	0.000000	0.000000	0.000000	0.000000	
0.310000	0.000000	0.000000	0.000000	0.000000	0.000000	0.000000	0.000000	-31.277693	0.000000	0.000000	0.000000	0.000000	0.000000	0.000000	0.000000	0.000000	0.000000	0.000000	0.000000	0.000000	0.000000	0.000000	0.000000	0.000000	0.000000	0.000000	0.000000	-100.000000	0.000000	0.000000	0.000000	0.000000	0.000000	0.000000	
0.320000	0.000000	0.000000	0.000000	0.000000	0.000000	0.000000	0.000000	-31.042047	0.000000	0.000000	0.000000	0.000000	0.000000	0.000000	0.000000	0.000000	0.000000	0.000000	0.000000	0.000000	0.000000	0.000000	0.000000	0.000000	0.000000	0.000000	0.000000	-100.000000	0.000000	0.000000	0.000000	0.000000	0.000000	0.000000	
0.330000	0.000000	0.000000	0.000000	0.000000	0.000000	0.000000	0.000000	-30.799985	0.000000	0.000000	0.000000	0.000000	0.000000	0.000000	0.000000	0.000000	0.000000	0.000000	0.000000	0.000000	0.000000	0.000000	0.000000	0.000000	0.000000	0.000000	0.000000	-100.000000	0.000000	0.000000	0.000000	0.000000	0.000000	0.000000	
0.340000	0.000000	0.000000	0.000000	0.000000	0.000000	0.000000	0.000000	-30.551603	0.000000	0.000000	0.000000	0.000000	0.000000	0.000000	0.000000	0.000000	0.000000	0.000000	0.000000	0.000000	0.000000	0.000000	0.000000	0.000000	0.000000	0.000000	0.000000	-100.000000	0.000000	0.000000	0.000000	0.000000	0.000000	0.000000	
0.350000	0.000000	0.000000	0.000000	0.000000	0.000000	0.000000	0.000000	-30.297001	0.000000	0.000000	0.000000	0.000000	0.000000	0.000000	0.000000	0.000000	0.000000	0.000000	0.000000	0.000000	0.000000	0.000000	0.000000	0.000000	0.000000	0.000000	0.000000	-100.000000	0.000000	0.000000	0.000000	0.000000	0.000000	0.000000	
0.360000	0.000000	0.000000	0.000000	0.000000	0.000000	0.000000	0.000000	-30.036280	0.000000	0.000000	0.000000	0.000000	0.000000	0.000000	0.000000	0.000000	0.000000	0.000000	0.000000	0.000000	0.000000	0.000000	0.000000	0.000000	0.000000	0.000000	0.000000	-100.000000	0.000000	0.000000	0.000000	0.000000	0.000000	0.000000	
0.370000	0.000000	0.000000	0.000000	0.000000	0.000000	0.000000	0.000000	-29.769546	0.000000	0.000000	0.000000	0.000000	0.000000	0.000000	0.000000	0.000000	0.000000	0.000000	0.000000	0.000000	0.000000	0.000000	0.000000	0.000000	0.000000	0.000000	0.000000	-100.000000	0.000000	0.000000	0.000000	0.000000	0.000000	0.000000	
0.380000	0.000000	0.000000	0.000000	0.000000	0.000000	0.000000	0.000000	-29.496904	0.000000	0.000000	0.000000	0.000000	0.000000	0.000000	0.000000	0.000000	0.000000	0.000000	0.000000	0.000000	0.000000	0.000000	0.000000	0.000000	0.000000	0.000000	0.000000	-100.000000	0.000000	0.000000	0.000000	0.000000	0.000000	0.000000	
0.390000	0.000000	0.000000	0.000000	0.000000	0.000000	0.000000	0.000000	-29.218463	0.000000	0.000000	0.000000	0.000000	0.000000	0.000000	0.000000	0.000000	0.000000	0.000000	0.000000	0.000000	0.000000	0.000000	0.000000	0.000000	0.000000	0.000000	0.000000	-100.000000	0.000000	0.000000	0.000000	0.000000	0.000000	0.000000	
0.400000	0.000000	0.000000	0.000000	0.000000	0.000000	0.000000	0.000000	-28.934336	0.000000	0.000000	0.000000	0.000000	0.000000	0.000000	0.000000	0.000000	0.000000	0.000000	0.000000	0.000000	0.000000	0.000000	0.000000	0.000000	0.000000	0.000000	0.000000	-100.000000	0.000000	0.000000	0.000000	0.000000	0.000000	0.000000	
0.410000	0.000000	0.000000	0.000000	0.000000	0.000000	0.000000	0.000000	-28.644636	0.000000	0.000000	0.000000	0.000000	0.000000	0.000000	0.000000	0.000000	0.000000	0.000000	0.000000	0.000000	0.000000	0.000000	0.000000	0.000000	0.000000	0.000000	0.000000	-100.000000	0.000000	0.000000	0.000000	0.000000	0.000000	0.000000	
0.420000	0.000000	0.000000	0.000000	0.000000	0.000000	0.000000	0.000000	-28.349478	0.000000	0.000000	0.000000	0.000000	0.000000	0.000000	0.000000	0.000000	0.000000	0.000000	0.000000	0.000000	0.000000	0.000000	0.000000	0.000000	0.000000	0.000000	0.000000	-100.000000	0.000000	0.000000	0.000000	0.000000	0.000000	0.000000	
0.430000	0.000000	0.000000	0.000000	0.000000	0.000000	0.000000	0.000000	-28.048981	0.000000	0.000000	0.000000	0.000000	0.000000	0.000000	0.000000	0.000000	0.000000	0.000000	0.000000	0.000000	0.000000	0.000000	0.000000	0.000000	0.000000	0.000000	0.000000	-100.000000	0.000000	0.000000	0.000000	0.000000	0.000000	0.000000	
0.440000	0.000000	0.000000	0.000000	0.000000	0.000000	0.000000	0.000000	-27.743265	0.000000	0.000000	0.000000	0.000000	0.000000	0.000000	0.000000	0.000000	0.000000	0.000000	0.000000	0.000000	0.000000	0.000000	0.000000	0.000000	0.000000	0.000000	0.000000	-100.000000	0.000000	0.000000	0.000000	0.000000	0.000000	0.000000	
0.450000	0.000000	0.000000	0.000000	0.000000	0.000000	0.000000	0.000000	-27.432452	0.000000	0.000000	0.000000	0.000000	0.000000	0.000000	0.000000	0.000000	0.000000	0.000000	0.000000	0.000000	0.000000	0.000000	0.000000	0.000000	0.000000	0.000000	0.000000	-100.000000	0.000000	0.000000	0.000000	0.000000	0.000000	0.000000	
0.460000	0.000000	0.000000	0.000000	0.000000	0.000000	0.000000	0.000000	-27.116666	0.000000	0.000000	0.000000	0.000000	0.000000	0.000000	0.000000	0.000000	0.000000	0.000000	0.000000	0.000000	0.000000	0.000000	0.000000	0.000000	0.000000	0.000000	0.000000	-100.000000	0.000000	0.000000	0.000000	0.000000	0.000000	0.000000	
0.470000	0.000000	0.000000	0.000000	0.000000	0.000000	0.000000	0.000000	-26.796034	0.000000	0.000000	0.000000	0.000000	0.000000	0.000000	0.000000	0.000000	0.000000	0.000000	0.000000	0.000000	0.000000	0.000000	0.000000	0.000000	0.000000	0.000000	0.000000	-100.000000	0.000000	0.000000	0.000000	0.000000	0.000000	0.000000	
0.480000	0.000000	0.000000	0.000000	0.000000	0.000000	0.000000	0.000000	-26.470684	0.000000	0.000000	0.000000	0.000000	0.000000	0.000000	0.000000	0.000000	0.000000	0.000000	0.000000	0.000000	0.000000	0.000000	0.000000	0.000000	0.000000	0.000000	0.000000	-100.000000	0.000000	0.000000	0.000000	0.000000	0.000000	0.000000	
0.490000	0.000000	0.000000	0.000000	0.000000	0.000000	0.000000	0.000000	-26.140746	0.000000	0.000000	0.000000	0.000000	0.000000	0.000000	0.000000	0.000000	0.000000	0.000000	0.000000	0.000000	0.000000	0.000000	0.000000	0.000000	0.000000	0.000000	0.000000	-100.000000	0.000000	0.000000	0.000000	0.000000	0.000000	0.000000	
0.500000	0.000000	0.000000	0.000000	0.000000	0.000000	0.000000	0.000000	-25.806353	0.000000	0.000000	0.000000	0.000000	0.000000	0.000000	0.000000	0.000000	0.000000	0.000000	0.000000	0.000000	0.000000	0.000000	0.000000	0.000000	0.000000	0.000000	0.000000	-100.000000	0.000000	0.000000	0.000000	0.000000	0.000000	0.000000	
0.510000	0.000000	0.000000	0.000000	0.000000	0.000000	0.000000	0.000000	-25.467637	0.000000	0.000000	0.000000	0.000000	0.000000	0.000000	0.000000	0.000000	0.000000	0.000000	0.000000	0.000000	0.000000	0.000000	0.000000	0.000000	0.000000	0.000000	0.000000	-100.000000	0.000000	0.000000	0.000000	0.000000	0.000000	0.000000	
0.520000	0.000000	0.000000	0.000000	0.000000	0.000000	0.000000	0.000000	-25.124734	0.000000	0.000000	0.000000	0.000000	0.000000	0.000000	0.000000	0.000000	0.000000	0.000000	0.000000	0.000000	0.000000	0.000000	0.000000	0.000000	0.000000	0.000000	0.000000	-100.000000	0.000000	0.000000	0.000000	0.000000	0.000000	0.000000	
0.530000	0.000000	0.000000	0.000000	0.000000	0.000000	0.000000	0.000000	-24.777782	0.000000	0.000000	0.000000	0.000000	0.000000	0.000000	0.000000	0.000000	0.000000	0.000000	0.000000	0.000000	0.000000	0.000000	0.000000	0.000000	0.000000	0.000000	0.000000	-100.000000	0.000000	0.000000	0.000000	0.000000	0.000000	0.000000	
0.540000	0.000000	0.000000	0.000000	0.000000	0.000000	0.000000	0.000000	-24.426920	0.000000	0.000000	0.000000	0.000000	0.000000	0.000000	0.000000	0.000000	0.000000	0.000000	0.000000	0.000000	0.000000	0.000000	0.000000	0.000000	0.000000	0.000000	0.000000	-100.000000	0.000000	0.000000	0.000000	0.000000	0.000000	0.000000	
0.550000	0.000000	0.000000	0.000000	0.000000	0.000000	0.000000	0.000000	-24.072287	0.000000	0.000000	0.000000	0.000000	0.000000	0.000000	0.000000	0.000000	0.000000	0.000000	0.000000	0.000000	0.000000	0.000000	0.000000	0.000000	0.000000	0.000000	0.000000	-100.000000	0.000000	0.000000	0.000000	0.000000	0.000000	0.000000	
0.560000	0.000000	0.000000	0.000000	0.000000	0.000000	0.000000	0.000000	-23.714025	0.000000	0.000000	0.000000	0.000000	0.000000	0.000000	0.000000	0.000000	0.000000	0.000000	0.000000	0.000000	0.000000	0.000000	0.000000	0.000000	0.000000	0.000000	0.000000	-100.000000	0.000000	0.000000	0.000000	0.000000	0.000000	0.000000	
0.570000	0.000000	0.000000	0.000000	0.000000	0.000000	0.000000	0.000000	-23.352278	0.000000	0.000000	0.000000	0.000000	0.000000	0.000000	0.000000	0.000000	0.000000	0.000000	0.000000	0.000000	0.000000	0.000000	0.000000	0.000000	0.000000	0.000000	0.000000	-100.000000	0.000000	0.000000	0.000000	0.000000	0.000000	0.000000	
0.580000	0.000000	0.000000	0.000000	0.000000	0.000000	0.000000	0.000000	-22.987191	0.000000	0.000000	0.000000	0.000000	0.000000	0.000000	0.000000	0.000000	0.000000	0.000000	0.000000	0.000000	0.000000	0.000000	0.000000	0.000000	0.000000	0.000000	0.000000	-100.000000	0.000000	0.000000	0.000000	0.000000	0.000000	0.000000	
0.590000	0.000000	0.000000	0.000000	0.000000	0.000000	0.000000	0.000000	-22.618909	0.000000	0.000000	0.000000	0.000000	0.000000	0.000000	0.000000	0.000000	0.000000	0.000000	0.000000	0.000000	0.000000	0.000000	0.000000	0.000000	0.000000	0.000000	0.000000	-100.000000	0.000000	0.000000	0.000000	0.000000	0.000000	0.000000	
0.600000	0.000000	0.000000	0.000000	0.000000	0.000000	0.000000	0.000000	-22.247580	0.000000	0.000000	0.000000	0.000000	0.000000	0.000000	0.000000	0.000000	0.000000	0.000000	0.000000	0.000000	0.000000	0.000000	0.000000	0.000000	0.000000	0.000000	0.000000	-100.000000	0.000000	0.000000	0.000000	0.000000	0.000000	0.000000	
0.610000	0.000000	0.000000	0.000000	0.000000	0.000000	0.000000	0.000000	-21.873352	0.000000	0.000000	0.000000	0.000000	0.000000	0.000000	0.000000	0.000000	0.000000	0.000000	0.000000	0.000000	0.000000	0.000000	0.000000	0.000000	0.000000	0.000000	0.000000	-100.000000	0.000000	0.000000	0.000000	0.000000	0.000000	0.000000	
0.620000	0.000000	0.000000	0.000000	0.000000	0.000000	0.000000	0.000000	-21.496376	0.000000	0.000000	0.000000	0.000000	0.000000	0.000000	0.000000	0.000000	0.000000	0.000000	0.000000	0.000000	0.000000	0.000000	0.000000	0.000000	0.000000	0.000000	0.000000	-100.000000	0.000000	0.000000	0.000000	0.000000	0.000000	0.000000	
0.630000	0.000000	0.000000	0.000000	0.000000	0.000000	0.000000	0.000000	-21.116801	0.000000	0.000000	0.000000	0.000000	0.000000	0.000000	0.000000	0.000000	0.000000	0.000000	0.000000	0.000000	0.000000	0.000000	0.000000	0.000000	0.000000	0.000000	0.000000	-100.000000	0.000000	0.000000	0.000000	0.000000	0.000000	0.000000	
0.640000	0.000000	0.000000	0.000000	0.000000	0.000000	0.000000	0.000000	-20.734780	0.000000	0.000000	0.000000	0.000000	0.000000	0.000000	0.000000	0.000000	0.000000	0.000000	0.000000	0.000000	0.000000	0.000000	0.000000	0.000000	0.000000	0.000000	0.000000	-100.000000	0.000000	0.000000	0.000000	0.000000	0.000000	0.000000	
0.650000	0.000000	0.000000	0.000000	0.000000	0.000000	0.000000	0.000000	-20.350465	0.000000	0.000000	0.000000	0.000000	0.000000	0.000000	0.000000	0.000000	0.000000	0.000000	0.000000	0.000000	0.000000	0.000000	0.000000	0.000000	0.000000	0.000000	0.000000	-100.000000	0.000000	0.000000	0.000000	0.000000	0.000000	0.000000	
0.660000	0.000000	0.000000	0.000000	0.000000	0.000000	0.000000	0.000000	-19.964010	0.000000	0.000000	0.000000	0.000000	0.000000	0.000000	0.000000	0.000000	0.000000	0.000000	0.000000	0.000000	0.000000	0.000000	0.000000	0.000000	0.000000	0.000000	0.000000	-100.000000	0.000000	0.000000	0.000000	0.000000	0.000000	0.000000	
0.670000	0.000000	0.000000	0.000000	0.000000	0.000000	0.000000	0.000000	-19.575570	0.000000	0.000000	0.000000	0.000000	0.000000	0.000000	0.000000	0.000000	0.000000	0.000000	0.000000	0.000000	0.000000	0.000000	0.000000	0.000000	0.000000	0.000000	0.000000	-100.000000	0.000000	0.000000	0.000000	0.000000	0.000000	0.000000	
0.680000	0.000000	0.000000	0.000000	0.000000	0.000000	0.000000	0.000000	-19.185300	0.000000	0.000000	0.000000	0.000000	0.000000	0.000000	0.000000	0.000000	0.000000	0.000000	0.000000	0.000000	0.000000	0.000000	0.000000	0.000000	0.000000	0.000000	0.000000	-100.000000	0.000000	0.000000	0.000000	0.000000	0.000000	0.000000	
0.690000	0.000000	0.000000	0.000000	0.000000	0.000000	0.000000	0.000000	-18.793357	0.000000	0.000000	0.000000	0.000000	0.000000	0.000000	0.000000	0.000000	0.000000	0.000000	0.000000	0.000000	0.000000	0.000000	0.000000	0.000000	0.000000	0.000000	0.000000	-100.000000	0.000000	0.000000	0.000000	0.000000	0.000000	0.000000	
0.700000	0.000000	0.000000	0.000000	0.000000	0.000000	0.000000	0.000000	-18.399896	0.000000	0.000000	0.000000	0.000000	0.000000	0.000000	0.000000	0.000000	0.000000	0.000000	0.000000	0.000000	0.000000	0.000000	0.000000	0.000000	0.000000	0.000000	0.000000	-100.000000	0.000000	0.000000	0.000000	0.000000	0.000000	0.000000	
0.710000	0.000000	0.000000	0.000000	0.000000	0.000000	0.000000	0.000000	-18.005076	0.000000	0.000000	0.000000	0.000000	0.000000	0.000000	0.000000	0.000000	0.000000	0.000000	0.000000	0.000000	0.000000	0.000000	0.000000	0.000000	0.000000	0.000000	0.000000	-100.000000	0.000000	0.000000	0.000000	0.000000	0.000000	0.000000	
0.720000	0.000000	0.000000	0.000000	0.000000	0.000000	0.000000	0.000000	-17.609054	0.000000	0.000000	0.000000	0.000000	0.000000	0.000000	0.000000	0.000000	0.000000	0.000000	0.000000	0.000000	0.000000	0.000000	0.000000	0.000000	0.000000	0.000000	0.000000	-100.000000	0.000000	0.000000	0.000000	0.000000	0.000000	0.000000	
0.730000	0.000000	0.000000	0.000000	0.000000	0.000000	0.000000	0.000000	-17.211989	0.000000	0.000000	0.000000	0.000000	0.000000	0.000000	0.000000	0.000000	0.000000	0.000000	0.000000	0.000000	0.000000	0.000000	0.000000	0.000000	0.000000	0.000000	0.000000	-100.000000	0.000000	0.000000	0.000000	0.000000	0.000000	0.000000	
0.740000	0.000000	0.000000	0.000000	0.000000	0.000000	0.000000	0.000000	-16.814039	0.000000	0.000000	0.000000	0.000000	0.000000	0.000000	0.000000	0.000000	0.000000	0.000000	0.000000	0.000000	0.000000	0.000000	0.000000	0.000000	0.000000	0.000000	0.000000	-100.000000	0.000000	0.000000	0.000000	0.000000	0.000000	0.000000	
0.750000	0.000000	0.000000	0.000000	0.000000	0.000000	0.000000	0.000000	-16.415364	0.000000	0.000000	0.000000	0.000000	0.000000	0.000000	0.000000	0.000000	0.000000	0.000000	0.000000	0.000000	0.000000	0.000000	0.000000	0.000000	0.000000	0.000000	0.000000	-100.000000	0.000000	0.000000	0.000000	0.000000	0.000000	0.000000	
0.760000	0.000000	0.000000	0.000000	0.000000	0.000000	0.000000	0.000000	-16.016123	0.000000	0.000000	0.000000	0.000000	0.000000	0.000000	0.000000	0.000000	0.000000	0.000000	0.000000	0.000000	0.000000	0.000000	0.000000	0.000000	0.000000	0.000000	0.000000	-100.000000	0.000000	0.000000	0.000000	0.000000	0.000000	0.000000	
0.770000	0.000000	0.000000	0.000000	0.000000	0.000000	0.000000	0.000000	-15.616475	0.000000	0.000000	0.000000	0.000000	0.000000	0.000000	0.000000	0.000000	0.000000	0.000000	0.000000	0.000000	0.000000	0.000000	0.000000	0.000000	0.000000	0.000000	0.000000	-100.000000	0.000000	0.000000	0.000000	0.000000	0.000000	0.000000	
0.780000	0.000000	0.000000	0.000000	0.000000	0.000000	0.000000	0.000000	-15.216582	0.000000	0.000000	0.000000	0.000000	0.000000	0.000000	0.000000	0.000000	0.000000	0.000000	0.000000	0.000000	0.000000	0.000000	0.000000	0.000000	0.000000	0.000000	0.000000	-100.000000	0.000000	0.000000	0.000000	0.000000	0.000000	0.000000	
0.790000	0.000000	0.000000	0.000000	0.000000	0.000000	0.000000	0.000000	-14.816602	0.000000	0.000000	0.000000	0.000000	0.000000	0.000000	0.000000	0.000000	0.000000	0.000000	0.000000	0.000000	0.000000	0.000000	0.000000	0.000000	0.000000	0.000000	0.000000	-100.000000	0.000000	0.000000	0.000000	0.000000	0.000000	0.000000	
0.800000	0.000000	0.000000	0.000000	0.000000	0.000000	0.000000	0.000000	-14.416696	0.000000	0.000000	0.000000	0.000000	0.000000	0.000000	0.000000	0.000000	0.000000	0.000000	0.000000	0.000000	0.000000	0.000000	0.000000	0.000000	0.000000	0.000000	0.000000	-100.000000	0.000000	0.000000	0.000000	0.000000	0.000000	0.000000	
0.810000	0.000000	0.000000	0.000000	0.000000	0.000000	0.000000	0.000000	-14.017023	0.000000	0.000000	0.000000	0.000000	0.000000	0.000000	0.000000	0.000000	0.000000	0.000000	0.000000	0.000000	0.000000	0.000000	0.000000	0.000000	0.000000	0.000000	0.000000	-100.000000	0.000000	0.000000	0.000000	0.000000	0.000000	0.000000	
0.820000	0.000000	0.000000	0.000000	0.000000	0.000000	0.000000	0.000000	-13.617744	0.000000	0.000000	0.000000	0.000000	0.000000	0.000000	0.000000	0.000000	0.000000	0.000000	0.000000	0.000000	0.000000	0.000000	0.000000	0.000000	0.000000	0.000000	0.000000	-100.000000	0.000000	0.000000	0.000000	0.000000	0.000000	0.000000	
0.830000	0.000000	0.000000	0.000000	0.000000	0.000000	0.000000	0.000000	-13.219018	0.000000	0.000000	0.000000	0.000000	0.000000	0.000000	0.000000	0.000000	0.000000	0.000000	0.000000	0.000000	0.000000	0.000000	0.000000	0.000000	0.000000	0.000000	0.000000	-100.000000	0.000000	0.000000	0.000000	0.000000	0.000000	0.000000	
0.840000	0.000000	0.000000	0.000000	0.000000	0.000000	0.000000	0.000000	-12.821004	0.000000	0.000000	0.000000	0.000000	0.000000	0.000000	0.000000	0.000000	0.000000	0.000000	0.000000	0.000000	0.000000	0.000000	0.000000	0.000000	0.000000	0.000000	0.000000	-100.000000	0.000000	0.000000	0.000000	0.000000	0.000000	0.000000	
0.850000	0.000000	0.000000	0.000000	0.000000	0.000000	0.000000	0.000000	-12.423863	0.000000	0.000000	0.000000	0.000000	0.000000	0.000000	0.000000	0.000000	0.000000	0.000000	0.000000	0.000000	0.000000	0.000000	0.000000	0.000000	0.000000	0.000000	0.000000	-100.000000	0.000000	0.000000	0.000000	0.000000	0.000000	0.000000	
0.860000	0.000000	0.000000	0.000000	0.000000	0.000000	0.000000	0.000000	-12.027752	0.000000	0.000000	0.000000	0.000000	0.000000	0.000000	0.000000	0.000000	0.000000	0.000000	0.000000	0.000000	0.000000	0.000000	0.000000	0.000000	0.000000	0.000000	0.000000	-100.000000	0.000000	0.000000	0.000000	0.000000	0.000000	0.000000	
0.870000	0.000000	0.000000	0.000000	0.000000	0.000000	0.000000	0.000000	-11.632830	0.000000	0.000000	0.000000	0.000000	0.000000	0.000000	0.000000	0.000000	0.000000	0.000000	0.000000	0.000000	0.000000	0.000000	0.000000	0.000000	0.000000	0.000000	0.000000	-100.000000	0.000000	0.000000	0.000000	0.000000	0.000000	0.000000	
0.880000	0.000000	0.000000	0.000000	0.000000	0.000000	0.000000	0.000000	-11.239255	0.000000	0.000000	0.000000	0.000000	0.000000	0.000000	0.000000	0.000000	0.000000	0.000000	0.000000	0.000000	0.000000	0.000000	0.000000	0.000000	0.000000	0.000000	0.000000	-100.000000	0.000000	0.000000	0.000000	0.000000	0.000000	0.000000	
0.890000	0.000000	0.000000	0.000000	0.000000	0.000000	0.000000	0.000000	-10.847185	0.000000	0.000000	0.000000	0.000000	0.000000	0.000000	0.000000	0.000000	0.000000	0.000000	0.000000	0.000000	0.000000	0.000000	0.000000	0.000000	0.000000	0.000000	0.000000	-100.000000	0.000000	0.000000	0.000000	0.000000	0.000000	0.000000	
0.900000	0.000000	0.000000	0.000000	0.000000	0.000000	0.000000	0.000000	-10.456776	0.000000	0.000000	0.000000	0.000000	0.000000	0.000000	0.000000	0.000000	0.000000	0.000000	0.000000	0.000000	0.000000	0.000000	0.000000	0.000000	0.000000	0.000000	0.000000	-100.000000	0.000000	0.000000	0.000000	0.000000	0.000000	0.000000	
0.910000	0.000000	0.000000	0.000000	0.000000	0.000000	0.000000	0.000000	-10.068185	0.000000	0.000000	0.000000	0.000000	0.000000	0.000000	0.000000	0.000000	0.000000	0.000000	0.000000	0.000000	0.000000	0.000000	0.000000	0.000000	0.000000	0.000000	0.000000	-100.000000	0.000000	0.000000	0.000000	0.000000	0.000000	0.000000	
0.920000	0.000000	0.000000	0.000000	0.000000	0.000000	0.000000	0.000000	-9.681566	0.000000	0.000000	0.000000	0.000000	0.000000	0.000000	0.000000	0.000000	0.000000	0.000000	0.000000	0.000000	0.000000	0.000000	0.000000	0.000000	0.000000	0.000000	0.000000	-100.000000	0.000000	0.000000	0.000000	0.000000	0.000000	0.000000	
0.930000	0.000000	0.000000	0.000000	0.000000	0.000000	0.000000	0.000000	-9.297076	0.000000	0.000000	0.000000	0.000000	0.000000	0.000000	0.000000	0.000000	0.000000	0.000000	0.000000	0.000000	0.000000	0.000000	0.000000	0.000000	0.000000	0.000000	0.000000	-100.000000	0.000000	0.000000	0.000000	0.000000	0.000000	0.000000	
0.940000	0.000000	0.000000	0.000000	0.000000	0.000000	0.000000	0.000000	-8.914866	0.000000	0.000000	0.000000	0.000000	0.000000	0.000000	0.000000	0.000000	0.000000	0.000000	0.000000	0.000000	0.000000	0.000000	0.000000	0.000000	0.000000	0.000000	0.000000	-100.000000	0.000000	0.000000	0.000000	0.000000	0.000000	0.000000	
0.950000	0.000000	0.000000	0.000000	0.000000	0.000000	0.000000	0.000000	-8.535091	0.000000	0.000000	0.000000	0.000000	0.000000	0.000000	0.000000	0.000000	0.000000	0.000000	0.000000	0.000000	0.000000	0.000000	0.000000	0.000000	0.000000	0.000000	0.000000	-100.000000	0.000000	0.000000	0.000000	0.000000	0.000000	0.000000	
0.960000	0.000000	0.000000	0.000000	0.000000	0.000000	0.000000	0.000000	-8.157902	0.000000	0.000000	0.000000	0.000000	0.000000	0.000000	0.000000	0.000000	0.000000	0.000000	0.000000	0.000000	0.000000	0.000000	0.000000	0.000000	0.000000	0.000000	0.000000	-100.000000	0.000000	0.000000	0.000000	0.000000	0.000000	0.000000	
0.970000	0.000000	0.000000	0.000000	0.000000	0.000000	0.000000	0.000000	-7.783450	0.000000	0.000000	0.000000	0.000000	0.000000	0.000000	0.000000	0.000000	0.000000	0.000000	0.000000	0.000000	0.000000	0.000000	0.000000	0.000000	0.000000	0.000000	0.000000	-100.000000	0.000000	0.000000	0.000000	0.000000	0.000000	0.000000	
0.980000	0.000000	0.000000	0.000000	0.000000	0.000000	0.000000	0.000000	-7.411884	0.000000	0.000000	0.000000	0.000000	0.000000	0.000000	0.000000	0.000000	0.000000	0.000000	0.000000	0.000000	0.000000	0.000000	0.000000	0.000000	0.000000	0.000000	0.000000	-100.000000	0.000000	0.000000	0.000000	0.000000	0.000000	0.000000	
0.990000	0.000000	0.000000	0.000000	0.000000	0.000000	0.000000	0.000000	-7.043354	0.000000	0.000000	0.000000	0.000000	0.000000	0.000000	0.000000	0.000000	0.000000	0.000000	0.000000	0.000000	0.000000	0.000000	0.000000	0.000000	0.000000	0.000000	0.000000	-100.000000	0.000000	0.000000	0.000000	0.000000	0.000000	0.000000	
1.000000	0.000000	0.000000	0.000000	0.000000	0.000000	0.000000	0.000000	-6.678007	0.000000	0.000000	0.000000	0.000000	0.000000	0.000000	0.000000	0.000000	0.000000	0.000000	0.000000	0.000000	0.000000	0.000000	0.000000	0.000000	0.000000	0.000000	0.000000	-100.000000	0.000000	0.000000	0.000000	0.000000	0.000000	0.000000	
1.010000	0.000000	0.000000	0.000000	0.000000	0.000000	0.000000	0.000000	-6.315989	0.000000	0.000000	0.000000	0.000000	0.000000	0.000000	0.000000	0.000000	0.000000	0.000000	0.000000	0.000000	0.000000	0.000000	0.000000	0.000000	0.000000	0.000000	0.000000	-100.000000	0.000000	0.000000	0.000000	0.000000	0.000000	0.000000	
1.020000	0.000000	0.000000	0.000000	0.000000	0.000000	0.000000	0.000000	-5.957445	0.000000	0.000000	0.000000	0.000000	0.000000	0.000000	0.000000	0.000000	0.000000	0.000000	0.000000	0.000000	0.000000	0.000000	0.000000	0.000000	0.000000	0.000000	0.000000	-100.000000	0.000000	0.000000	0.000000	0.000000	0.000000	0.000000	
1.030000	0.000000	0.000000	0.000000	0.000000	0.000000	0.000000	0.000000	-5.602518	0.000000	0.000000	0.000000	0.000000	0.000000	0.000000	0.000000	0.000000	0.000000	0.000000	0.000000	0.000000	0.000000	0.000000	0.000000	0.000000	0.000000	0.000000	0.000000	-100.000000	0.000000	0.000000	0.000000	0.000000	0.000000	0.000000	
1.040000	0.000000	0.000000	0.000000	0.000000	0.000000	0.000000	0.000000	-5.251350	0.000000	0.000000	0.000000	0.000000	0.000000	0.000000	0.000000	0.000000	0.000000	0.000000	0.000000	0.000000	0.000000	0.000000	0.000000	0.000000	0.000000	0.000000	0.000000	-100.000000	0.000000	0.000000	0.000000	0.000000	0.000000	0.000000	
1.050000	0.000000	0.000000	0.000000	0.000000	0.000000	0.000000	0.000000	-4.904081	0.000000	0.000000	0.000000	0.000000	0.000000	0.000000	0.000000	0.000000	0.000000	0.000000	0.000000	0.000000	0.000000	0.000000	0.000000	0.000000	0.000000	0.000000	0.000000	-100.000000	0.000000	0.000000	0.000000	0.000000	0.000000	0.000000	
1.060000	0.000000	0.000000	0.000000	0.000000	0.000000	0.000000	0.000000	-4.560851	0.000000	0.000000	0.000000	0.000000	0.000000	0.000000	0.000000	0.000000	0.000000	0.000000	0.000000	0.000000	0.000000	0.000000	0.000000	0.000000	0.000000	0.000000	0.000000	-100.000000	0.000000	0.000000	0.000000	0.000000	0.000000	0.000000	
1.070000	0.000000	0.000000	0.000000	0.000000	0.000000	0.000000	0.000000	-4.221797	0.000000	0.000000	0.000000	0.000000	0.000000	0.000000	0.000000	0.000000	0.000000	0.000000	0.000000	0.000000	0.000000	0.000000	0.000000	0.000000	0.000000	0.000000	0.000000	-100.000000	0.000000	0.000000	0.000000	0.000000	0.000000	0.000000	
1.080000	0.000000	0.000000	0.000000	0.000000	0.000000	0.000000	0.000000	-3.887054	0.000000	0.000000	0.000000	0.000000	0.000000	0.000000	0.000000	0.000000	0.000000	0.000000	0.000000	0.000000	0.000000	0.000000	0.000000	0.000000	0.000000	0.000000	0.000000	-100.000000	0.000000	0.000000	0.000000	0.000000	0.000000	0.000000	
1.090000	0.000000	0.000000	0.000000	0.000000	0.000000	0.000000	0.000000	-3.556757	0.000000	0.000000	0.000000	0.000000	0.000000	0.000000	0.000000	0.000000	0.000000	0.000000	0.000000	0.000000	0.000000	0.000000	0.000000	0.000000	0.000000	0.000000	0.000000	-100.000000	0.000000	0.000000	0.000000	0.000000	0.000000	0.000000	
1.100000	0.000000	0.000000	0.000000	0.000000	0.000000	0.000000	0.000000	-3.231037	0.000000	0.000000	0.000000	0.000000	0.000000	0.000000	0.000000	0.000000	0.000000	0.000000	0.000000	0.000000	0.000000	0.000000	0.000000	0.000000	0.000000	0.000000	0.000000	-100.000000	0.000000	0.000000	0.000000	0.000000	0.000000	0.000000	
1.110000	0.000000	0.000000	0.000000	0.000000	0.000000	0.000000	0.000000	-2.910024	0.000000	0.000000	0.000000	0.000000	0.000000	0.000000	0.000000	0.000000	0.000000	0.000000	0.000000	0.000000	0.000000	0.000000	0.000000	0.000000	0.000000	0.000000	0.000000	-100.000000	0.000000	0.000000	0.000000	0.000000	0.000000	0.000000	
1.120000	0.000000	0.000000	0.000000	0.000000	0.000000	0.000000	0.000000	-2.593848	0.000000	0.000000	0.000000	0.000000	0.000000	0.000000	0.000000	0.000000	0.000000	0.000000	0.000000	0.000000	0.000000	0.000000	0.000000	0.000000	0.000000	0.000000	0.000000	-100.000000	0.000000	0.000000	0.000000	0.000000	0.000000	0.000000	
1.130000	0.000000	0.000000	0.000000	0.000000	0.000000	0.000000	0.000000	-2.282634	0.000000	0.000000	0.000000	0.000000	0.000000	0.000000	0.000000	0.000000	0.000000	0.000000	0.000000	0.000000	0.000000	0.000000	0.000000	0.000000	0.000000	0.000000	0.000000	-100.000000	0.000000	0.000000	0.000000	0.000000	0.000000	0.000000	
1.140000	0.000000	0.000000	0.000000	0.000000	0.000000	0.000000	0.000000	-1.976508	0.000000	0.000000	0.000000	0.000000	0.000000	0.000000	0.000000	0.000000	0.000000	0.000000	0.000000	0.000000	0.000000	0.000000	0.000000	0.000000	0.000000	0.000000	0.000000	-100.000000	0.000000	0.000000	0.000000	0.000000	0.000000	0.000000	
1.150000	0.000000	0.000000	0.000000	0.000000	0.000000	0.000000	0.000000	-1.675590	0.000000	0.000000	0.000000	0.000000	0.000000	0.000000	0.000000	0.000000	0.000000	0.000000	0.000000	0.000000	0.000000	0.000000	0.000000	0.000000	0.000000	0.000000	0.000000	-100.000000	0.000000	0.000000	0.000000	0.000000	0.000000	0.000000	
1.160000	0.000000	0.000000	0.000000	0.000000	0.000000	0.000000	0.000000	-1.380003	0.000000	0.000000	0.000000	0.000000	0.000000	0.000000	0.000000	0.000000	0.000000	0.000000	0.000000	0.000000	0.000000	0.000000	0.000000	0.000000	0.000000	0.000000	0.000000	-100.000000	0.000000	0.000000	0.000000	0.000000	0.000000	0.000000	
1.170000	0.000000	0.000000	0.000000	0.000000	0.000000	0.000000	0.000000	-1.089864	0.000000	0.000000	0.000000	0.000000	0.000000	0.000000	0.000000	0.000000	0.000000	0.000000	0.000000	0.000000	0.000000	0.000000	0.000000	0.000000	0.000000	0.000000	0.000000	-100.000000	0.000000	0.000000	0.000000	0.000000	0.000000	0.000000	
1.180000	0.000000	0.000000	0.000000	0.000000	0.000000	0.000000	0.000000	-0.805289	0.000000	0.000000	0.000000	0.000000	0.000000	0.000000	0.000000	0.000000	0.000000	0.000000	0.000000	0.000000	0.000000	0.000000	0.000000	0.000000	0.000000	0.000000	0.000000	-100.000000	0.000000	0.000000	0.000000	0.000000	0.000000	0.000000	
1.190000	0.000000	0.000000	0.000000	0.000000	0.000000	0.000000	0.000000	-0.526392	0.000000	0.000000	0.000000	0.000000	0.000000	0.000000	0.000000	0.000000	0.000000	0.000000	0.000000	0.000000	0.000000	0.000000	0.000000	0.000000	0.000000	0.000000	0.000000	-100.000000	0.000000	0.000000	0.000000	0.000000	0.000000	0.000000	
1.200000	0.000000	0.000000	0.000000	0.000000	0.000000	0.000000	0.000000	-0.253284	0.000000	0.000000	0.000000	0.000000	0.000000	0.000000	0.000000	0.000000	0.000000	0.000000	0.000000	0.000000	0.000000	0.000000	0.000000	0.000000	0.000000	0.000000	0.000000	-100.000000	0.000000	0.000000	0.000000	0.000000	0.000000	0.000000	
1.210000	0.000000	0.000000	0.000000	0.000000	0.000000	0.000000	0.000000	0.013925	0.000000	0.000000	0.000000	0.000000	0.000000	0.000000	0.000000	0.000000	0.000000	0.000000	0.000000	0.000000	0.000000	0.000000	0.000000	0.000000	0.000000	0.000000	0.000000	-100.000000	0.000000	0.000000	0.000000	0.000000	0.000000	0.000000	
1.220000	0.000000	0.000000	0.000000	0.000000	0.000000	0.000000	0.000000	0.275128	0.000000	0.000000	0.000000	0.000000	0.000000	0.000000	0.000000	0.000000	0.000000	0.000000	0.000000	0.000000	0.000000	0.000000	0.000000	0.000000	0.000000	0.000000	0.000000	-100.000000	0.000000	0.000000	0.000000	0.000000	0.000000	0.000000	
1.230000	0.000000	0.000000	0.000000	0.000000	0.000000	0.000000	0.000000	0.530221	0.000000	0.000000	0.000000	0.000000	0.000000	0.000000	0.000000	0.000000	0.000000	0.000000	0.000000	0.000000	0.000000	0.000000	0.000000	0.000000	0.000000	0.000000	0.000000	-100.000000	0.000000	0.000000	0.000000	0.000000	0.000000	0.000000	
1.240000	0.000000	0.000000	0.000000	0.000000	0.000000	0.000000	0.000000	0.779102	0.000000	0.000000	0.000000	0.000000	0.000000	0.000000	0.000000	0.000000	0.000000	0.000000	0.000000	0.000000	0.000000	0.000000	0.000000	0.000000	0.000000	0.000000	0.000000	-100.000000	0.000000	0.000000	0.000000	0.000000	0.000000	0.000000	
1.250000	0.000000	0.000000	0.000000	0.000000	0.000000	0.000000	0.000000	1.021672	0.000000	0.000000	0.000000	0.000000	0.000000	0.000000	0.000000	0.000000	0.000000	0.000000	0.000000	0.000000	0.000000	0.000000	0.000000	0.000000	0.000000	0.000000	0.000000	-100.000000	0.000000	0.000000	0.000000	0.000000	0.000000	0.000000	
1.260000	0.000000	0.000000	0.000000	0.000000	0.000000	0.000000	0.000000	1.257832	0.000000	0.000000	0.000000	0.000000	0.000000	0.000000	0.000000	0.000000	0.000000	0.000000	0.000000	0.000000	0.000000	0.000000	0.000000	0.000000	0.000000	0.000000	0.000000	-100.000000	0.000000	0.000000	0.000000	0.000000	0.000000	0.000000	
1.270000	0.000000	0.000000	0.000000	0.000000	0.000000	0.000000	0.000000	1.487489	0.000000	0.000000	0.000000	0.000000	0.000000	0.000000	0.000000	0.000000	0.000000	0.000000	0.000000	0.000000	0.000000	0.000000	0.000000	0.000000	0.000000	0.000000	0.000000	-100.000000	0.000000	0.000000	0.000000	0.000000	0.000000	0.000000	
1.280000	0.000000	0.000000	0.000000	0.000000	0.000000	0.000000	0.000000	1.710552	0.000000	0.000000	0.000000	0.000000	0.000000	0.000000	0.000000	0.000000	0.000000	0.000000	0.000000	0.000000	0.000000	0.000000	0.000000	0.000000	0.000000	0.000000	0.000000	-100.000000	0.000000	0.000000	0.000000	0.000000	0.000000	0.000000	
1.290000	0.000000	0.000000	0.000000	0.000000	0.000000	0.000000	0.000000	1.926930	0.000000	0.000000	0.000000	0.000000	0.000000	0.000000	0.000000	0.000000	0.000000	0.000000	0.000000	0.000000	0.000000	0.000000	0.000000	0.000000	0.000000	0.000000	0.000000	-100.000000	0.000000	0.000000	0.000000	0.000000	0.000000	0.000000	
1.300000	0.000000	0.000000	0.000000	0.000000	0.000000	0.000000	0.000000	2.136537	0.000000	0.000000	0.000000	0.000000	0.000000	0.000000	0.000000	0.000000	0.000000	0.000000	0.000000	0.000000	0.000000	0.000000	0.000000	0.000000	0.000000	0.000000	0.000000	-100.000000	0.000000	0.000000	0.000000	0.000000	0.000000	0.000000	
1.310000	0.000000	0.000000	0.000000	0.000000	0.000000	0.000000	0.000000	2.339290	0.000000	0.000000	0.000000	0.000000	0.000000	0.000000	0.000000	0.000000	0.000000	0.000000	0.000000	0.000000	0.000000	0.000000	0.000000	0.000000	0.000000	0.000000	0.000000	-100.000000	0.000000	0.000000	0.000000	0.000000	0.000000	0.000000	
1.320000	0.000000	0.000000	0.000000	0.000000	0.000000	0.000000	0.000000	2.535107	0.000000	0.000000	0.000000	0.000000	0.000000	0.000000	0.000000	0.000000	0.000000	0.000000	0.000000	0.000000	0.000000	0.000000	0.000000	0.000000	0.000000	0.000000	0.000000	-100.000000	0.000000	0.000000	0.000000	0.000000	0.000000	0.000000	
1.330000	0.000000	0.000000	0.000000	0.000000	0.000000	0.000000	0.000000	2.723909	0.000000	0.000000	0.000000	0.000000	0.000000	0.000000	0.000000	0.000000	0.000000	0.000000	0.000000	0.000000	0.000000	0.000000	0.000000	0.000000	0.000000	0.000000	0.000000	-100.000000	0.000000	0.000000	0.000000	0.000000	0.000000	0.000000	
1.340000	0.000000	0.000000	0.000000	0.000000	0.000000	0.000000	0.000000	2.905623	0.000000	0.000000	0.000000	0.000000	0.000000	0.000000	0.000000	0.000000	0.000000	0.000000	0.000000	0.000000	0.000000	0.000000	0.000000	0.000000	0.000000	0.000000	0.000000	-100.000000	0.000000	0.000000	0.000000	0.000000	0.000000	0.000000	
1.350000	0.000000	0.000000	0.000000	0.000000	0.000000	0.000000	0.000000	3.080173	0.000000	0.000000	0.000000	0.000000	0.000000	0.000000	0.000000	0.000000	0.000000	0.000000	0.000000	0.000000	0.000000	0.000000	0.000000	0.000000	0.000000	0.000000	0.000000	-100.000000	0.000000	0.000000	0.000000	0.000000	0.000000	0.000000	
1.360000	0.000000	0.000000	0.000000	0.000000	0.000000	0.000000	0.000000	3.247492	0.000000	0.000000	0.000000	0.000000	0.000000	0.000000	0.000000	0.000000	0.000000	0.000000	0.000000	0.000000	0.000000	0.000000	0.000000	0.000000	0.000000	0.000000	0.000000	-100.000000	0.000000	0.000000	0.000000	0.000000	0.000000	0.000000	
1.370000	0.000000	0.000000	0.000000	0.000000	0.000000	0.000000	0.000000	3.407512	0.000000	0.000000	0.000000	0.000000	0.000000	0.000000	0.000000	0.000000	0.000000	0.000000	0.000000	0.000000	0.000000	0.000000	0.000000	0.000000	0.000000	0.000000	0.000000	-100.000000	0.000000	0.000000	0.000000	0.000000	0.000000	0.000000	
1.380000	0.000000	0.000000	0.000000	0.000000	0.000000	0.000000	0.000000	3.560169	0.000000	0.000000	0.000000	0.000000	0.000000	0.000000	0.000000	0.000000	0.000000	0.000000	0.000000	0.000000	0.000000	0.000000	0.000000	0.000000	0.000000	0.000000	0.000000	-100.000000	0.000000	0.000000	0.000000	0.000000	0.000000	0.000000	
1.390000	0.000000	0.000000	0.000000	0.000000	0.000000	0.000000	0.000000	3.705401	0.000000	0.000000	0.000000	0.000000	0.000000	0.000000	0.000000	0.000000	0.000000	0.000000	0.000000	0.000000	0.000000	0.000000	0.000000	0.000000	0.000000	0.000000	0.000000	-100.000000	0.000000	0.000000	0.000000	0.000000	0.000000	0.000000	
1.400000	0.000000	0.000000	0.000000	0.000000	0.000000	0.000000	0.000000	3.843152	0.000000	0.000000	0.000000	0.000000	0.000000	0.000000	0.000000	0.000000	0.000000	0.000000	0.000000	0.000000	0.000000	0.000000	0.000000	0.000000	0.000000	0.000000	0.000000	-100.000000	0.000000	0.000000	0.000000	0.000000	0.000000	0.000000	
1.410000	0.000000	0.000000	0.000000	0.000000	0.000000	0.000000	0.000000	3.973365	0.000000	0.000000	0.000000	0.000000	0.000000	0.000000	0.000000	0.000000	0.000000	0.000000	0.000000	0.000000	0.000000	0.000000	0.000000	0.000000	0.000000	0.000000	0.000000	-100.000000	0.000000	0.000000	0.000000	0.000000	0.000000	0.000000	
1.420000	0.000000	0.000000	0.000000	0.000000	0.000000	0.000000	0.000000	4.095989	0.000000	0.000000	0.000000	0.000000	0.000000	0.000000	0.000000	0.000000	0.000000	0.000000	0.000000	0.000000	0.000000	0.000000	0.000000	0.000000	0.000000	0.000000	0.000000	-100.000000	0.000000	0.000000	0.000000	0.000000	0.000000	0.000000	
1.430000	0.000000	0.000000	0.000000	0.000000	0.000000	0.000000	0.000000	4.210975	0.000000	0.000000	0.000000	0.000000	0.000000	0.000000	0.000000	0.000000	0.000000	0.000000	0.000000	0.000000	0.000000	0.000000	0.000000	0.000000	0.000000	0.000000	0.000000	-100.000000	0.000000	0.000000	0.000000	0.000000	0.000000	0.000000	
1.440000	0.000000	0.000000	0.000000	0.000000	0.000000	0.000000	0.000000	4.318276	0.000000	0.000000	0.000000	0.000000	0.000000	0.000000	0.000000	0.000000	0.000000	0.000000	0.000000	0.000000	0.000000	0.000000	0.000000	0.000000	0.000000	0.000000	0.000000	-100.000000	0.000000	0.000000	0.000000	0.000000	0.000000	0.000000	
1.450000	0.000000	0.000000	0.000000	0.000000	0.000000	0.000000	0.000000	4.417849	0.000000	0.000000	0.000000	0.000000	0.000000	0.000000	0.000000	0.000000	0.000000	0.000000	0.000000	0.000000	0.000000	0.000000	0.000000	0.000000	0.000000	0.000000	0.000000	-100.000000	0.000000	0.000000	0.000000	0.000000	0.000000	0.000000	
1.460000	0.000000	0.000000	0.000000	0.000000	0.000000	0.000000	0.000000	4.509656	0.000000	0.000000	0.000000	0.000000	0.000000	0.000000	0.000000	0.000000	0.000000	0.000000	0.000000	0.000000	0.000000	0.000000	0.000000	0.000000	0.000000	0.000000	0.000000	-100.000000	0.000000	0.000000	0.000000	0.000000	0.000000	0.000000	
1.470000	0.000000	0.000000	0.000000	0.000000	0.000000	0.000000	0.000000	4.593659	0.000000	0.000000	0.000000	0.000000	0.000000	0.000000	0.000000	0.000000	0.000000	0.000000	0.000000	0.000000	0.000000	0.000000	0.000000	0.000000	0.000000	0.000000	0.000000	-100.000000	0.000000	0.000000	0.000000	0.000000	0.000000	0.000000	
1.480000	0.000000	0.000000	0.000000	0.000000	0.000000	0.000000	0.000000	4.669824	0.000000	0.000000	0.000000	0.000000	0.000000	0.000000	0.000000	0.000000	0.000000	0.000000	0.000000	0.000000	0.000000	0.000000	0.000000	0.000000	0.000000	0.000000	0.000000	-100.000000	0.000000	0.000000	0.000000	0.000000	0.000000	0.000000	
1.490000	0.000000	0.000000	0.000000	0.000000	0.000000	0.000000	0.000000	4.738121	0.000000	0.000000	0.000000	0.000000	0.000000	0.000000	0.000000	0.000000	0.000000	0.000000	0.000000	0.000000	0.000000	0.000000	0.000000	0.000000	0.000000	0.000000	0.000000	-100.000000	0.000000	0.000000	0.000000	0.000000	0.000000	0.000000	
1.500000	0.000000	0.000000	0.000000	0.000000	0.000000	0.000000	0.000000	4.798523	0.000000	0.000000	0.000000	0.000000	0.000000	0.000000	0.000000	0.000000	0.000000	0.000000	0.000000	0.000000	0.000000	0.000000	0.000000	0.000000	0.000000	0.000000	0.000000	-100.000000	0.000000	0.000000	0.000000	0.000000	0.000000	0.000000	
1.510000	0.000000	0.000000	0.000000	0.000000	0.000000	0.000000	0.000000	4.851006	0.000000	0.000000	0.000000	0.000000	0.000000	0.000000	0.000000	0.000000	0.000000	0.000000	0.000000	0.000000	0.000000	0.000000	0.000000	0.000000	0.000000	0.000000	0.000000	-100.000000	0.000000	0.000000	0.000000	0.000000	0.000000	0.000000	
1.520000	0.000000	0.000000	0.000000	0.000000	0.000000	0.000000	0.000000	4.895548	0.000000	0.000000	0.000000	0.000000	0.000000	0.000000	0.000000	0.000000	0.000000	0.000000	0.000000	0.000000	0.000000	0.000000	0.000000	0.000000	0.000000	0.000000	0.000000	-100.000000	0.000000	0.000000	0.000000	0.000000	0.000000	0.000000	
1.530000	0.000000	0.000000	0.000000	0.000000	0.000000	0.000000	0.000000	4.932132	0.000000	0.000000	0.000000	0.000000	0.000000	0.000000	0.000000	0.000000	0.000000	0.000000	0.000000	0.000000	0.000000	0.000000	0.000000	0.000000	0.000000	0.000000	0.000000	-100.000000	0.000000	0.000000	0.000000	0.000000	0.000000	0.000000	
1.540000	0.000000	0.000000	0.000000	0.000000	0.000000	0.000000	0.000000	4.960743	0.000000	0.000000	0.000000	0.000000	0.000000	0.000000	0.000000	0.000000	0.000000	0.000000	0.000000	0.000000	0.000000	0.000000	0.000000	0.000000	0.000000	0.000000	0.000000	-100.000000	0.000000	0.000000	0.000000	0.000000	0.000000	0.000000	
1.550000	0.000000	0.000000	0.000000	0.000000	0.000000	0.000000	0.000000	4.981370	0.000000	0.000000	0.000000	0.000000	0.000000	0.000000	0.000000	0.000000	0.000000	0.000000	0.000000	0.000000	0.000000	0.000000	0.000000	0.000000	0.000000	0.000000	0.000000	-100.000000	0.000000	0.000000	0.000000	0.000000	0.000000	0.000000	
1.560000	0.000000	0.000000	0.000000	0.000000	0.000000	0.000000	0.000000	4.994005	0.000000	0.000000	0.000000	0.000000	0.000000	0.000000	0.000000	0.000000	0.000000	0.000000	0.000000	0.000000	0.000000	0.000000	0.000000	0.000000	0.000000	0.000000	0.000000	-100.000000	0.000000	0.000000	0.000000	0.000000	0.000000	0.000000	
1.570000	0.000000	0.000000	0.000000	0.000000	0.000000	0.000000	0.000000	4.998641	0.000000	0.000000	0.000000	0.000000	0.000000	0.000000	0.000000	0.000000	0.000000	0.000000	0.000000	0.000000	0.000000	0.000000	0.000000	0.000000	0.000000	0.000000	0.000000	-100.000000	0.000000	0.000000	0.000000	0.000000	0.000000	0.000000	
1.580000	0.000000	0.000000	0.000000	0.000000	0.000000	0.000000	0.000000	4.995279	0.000000	0.000000	0.000000	0.000000	0.000000	0.000000	0.000000	0.000000	0.000000	0.000000	0.000000	0.000000	0.000000	0.000000	0.000000	0.000000	0.000000	0.000000	0.000000	-100.000000	0.000000	0.000000	0.000000	0.000000	0.000000	0.000000	
1.590000	0.000000	0.000000	0.000000	0.000000	0.000000	0.000000	0.000000	4.983918	0.000000	0.000000	0.000000	0.000000	0.000000	0.000000	0.000000	0.000000	0.000000	0.000000	0.000000	0.000000	0.000000	0.000000	0.000000	0.000000	0.000000	0.000000	0.000000	-100.000000	0.000000	0.000000	0.000000	0.000000	0.000000	0.000000	
1.600000	0.000000	0.000000	0.000000	0.000000	0.000000	0.000000	0.000000	4.964563	0.000000	0.000000	0.000000	0.000000	0.000000	0.000000	0.000000	0.000000	0.000000	0.000000	0.000000	0.000000	0.000000	0.000000	0.000000	0.000000	0.000000	0.000000	0.000000	-100.000000	0.000000	0.000000	0.000000	0.000000	0.000000	0.000000	
1.610000	0.000000	0.000000	0.000000	0.000000	0.000000	0.000000	0.000000	4.937223	0.000000	0.000000	0.000000	0.000000	0.000000	0.000000	0.000000	0.000000	0.000000	0.000000	0.000000	0.000000	0.000000	0.000000	0.000000	0.000000	0.000000	0.000000	0.000000	-100.000000	0.000000	0.000000	0.000000	0.000000	0.000000	0.000000	
1.620000	0.000000	0.000000	0.000000	0.000000	0.000000	0.000000	0.000000	4.901908	0.000000	0.000000	0.000000	0.000000	0.000000	0.000000	0.000000	0.000000	0.000000	0.000000	0.000000	0.000000	0.000000	0.000000	0.000000	0.000000	0.000000	0.000000	0.000000	-100.000000	0.000000	0.000000	0.000000	0.000000	0.000000	0.000000	
1.630000	0.000000	0.000000	0.000000	0.000000	0.000000	0.000000	0.000000	4.858632	0.000000	0.000000	0.000000	0.000000	0.000000	0.000000	0.000000	0.000000	0.000000	0.000000	0.000000	0.000000	0.000000	0.000000	0.000000	0.000000	0.000000	0.000000	0.000000	-100.000000	0.000000	0.000000	0.000000	0.000000	0.000000	0.000000	
1.640000	0.000000	0.000000	0.000000	0.000000	0.000000	0.000000	0.000000	4.807413	0.000000	0.000000	0.000000	0.000000	0.000000	0.000000	0.000000	0.000000	0.000000	0.000000	0.000000	0.000000	0.000000	0.000000	0.000000	0.000000	0.000000	0.000000	0.000000	-100.000000	0.000000	0.000000	0.000000	0.000000	0.000000	0.000000	
1.650000	0.000000	0.000000	0.000000	0.000000	0.000000	0.000000	0.000000	4.748270	0.000000	0.000000	0.000000	0.000000	0.000000	0.000000	0.000000	0.000000	0.000000	0.000000	0.000000	0.000000	0.000000	0.000000	0.000000	0.000000	0.000000	0.000000	0.000000	-100.000000	0.000000	0.000000	0.000000	0.000000	0.000000	0.000000	
1.660000	0.000000	0.000000	0.000000	0.000000	0.000000	0.000000	0.000000	4.681229	0.000000	0.000000	0.000000	0.000000	0.000000	0.000000	0.000000	0.000000	0.000000	0.000000	0.000000	0.000000	0.000000	0.000000	0.000000	0.000000	0.000000	0.000000	0.000000	-100.000000	0.000000	0.000000	0.000000	0.000000	0.000000	0.000000	
1.670000	0.000000	0.000000	0.000000	0.000000	0.000000	0.000000	0.000000	4.606315	0.000000	0.000000	0.000000	0.000000	0.000000	0.000000	0.000000	0.000000	0.000000	0.000000	0.000000	0.000000	0.000000	0.000000	0.000000	0.000000	0.000000	0.000000	0.000000	-100.000000	0.000000	0.000000	0.000000	0.000000	0.000000	0.000000	
1.680000	0.000000	0.000000	0.000000	0.000000	0.000000	0.000000	0.000000	4.523558	0.000000	0.000000	0.000000	0.000000	0.000000	0.000000	0.000000	0.000000	0.000000	0.000000	0.000000	0.000000	0.000000	0.000000	0.000000	0.000000	0.000000	0.000000	0.000000	-100.000000	0.000000	0.000000	0.000000	0.000000	0.000000	0.000000	
1.690000	0.000000	0.000000	0.000000	0.000000	0.000000	0.000000	0.000000	4.432992	0.000000	0.000000	0.000000	0.000000	0.000000	0.000000	0.000000	0.000000	0.000000	0.000000	0.000000	0.000000	0.000000	0.000000	0.000000	0.000000	0.000000	0.000000	0.000000	-100.000000	0.000000	0.000000	0.000000	0.000000	0.000000	0.000000	
1.700000	0.000000	0.000000	0.000000	0.000000	0.000000	0.000000	0.000000	4.334653	0.000000	0.000000	0.000000	0.000000	0.000000	0.000000	0.000000	0.000000	0.000000	0.000000	0.000000	0.000000	0.000000	0.000000	0.000000	0.000000	0.000000	0.000000	0.000000	-100.000000	0.000000	0.000000	0.000000	0.000000	0.000000	0.000000	
1.710000	0.000000	0.000000	0.000000	0.000000	0.000000	0.000000	0.000000	4.228579	0.000000	0.000000	0.000000	0.000000	0.000000	0.000000	0.000000	0.000000	0.000000	0.000000	0.000000	0.000000	0.000000	0.000000	0.000000	0.000000	0.000000	0.000000	0.000000	-100.000000	0.000000	0.000000	0.000000	0.000000	0.000000	0.000000	
1.720000	0.000000	0.000000	0.000000	0.000000	0.000000	0.000000	0.000000	4.114815	0.000000	0.000000	0.000000	0.000000	0.000000	0.000000	0.000000	0.000000	0.000000	0.000000	0.000000	0.000000	0.000000	0.000000	0.000000	0.000000	0.000000	0.000000	0.000000	-100.000000	0.000000	0.000000	0.000000	0.000000	0.000000	0.000000	
1.730000	0.000000	0.000000	0.000000	0.000000	0.000000	0.000000	0.000000	3.993404	0.000000	0.000000	0.000000	0.000000	0.000000	0.000000	0.000000	0.000000	0.000000	0.000000	0.000000	0.000000	0.000000	0.000000	0.000000	0.000000	0.000000	0.000000	0.000000	-100.000000	0.000000	0.000000	0.000000	0.000000	0.000000	0.000000	
1.740000	0.000000	0.000000	0.000000	0.000000	0.000000	0.000000	0.000000	3.864396	0.000000	0.000000	0.000000	0.000000	0.000000	0.000000	0.000000	0.000000	0.000000	0.000000	0.000000	0.000000	0.000000	0.000000	0.000000	0.000000	0.000000	0.000000	0.000000	-100.000000	0.000000	0.000000	0.000000	0.000000	0.000000	0.000000	
1.750000	0.000000	0.000000	0.000000	0.000000	0.000000	0.000000	0.000000	3.727843	0.000000	0.000000	0.000000	0.000000	0.000000	0.000000	0.000000	0.000000	0.000000	0.000000	0.000000	0.000000	0.000000	0.000000	0.000000	0.000000	0.000000	0.000000	0.000000	-100.000000	0.000000	0.000000	0.000000	0.000000	0.000000	0.000000	
1.760000	0.000000	0.000000	0.000000	0.000000	0.000000	0.000000	0.000000	3.583798	0.000000	0.000000	0.000000	0.000000	0.000000	0.000000	0.000000	0.000000	0.000000	0.000000	0.000000	0.000000	0.000000	0.000000	0.000000	0.000000	0.000000	0.000000	0.000000	-100.000000	0.000000	0.000000	0.000000	0.000000	0.000000	0.000000	
1.770000	0.000000	0.000000	0.000000	0.000000	0.000000	0.000000	0.000000	3.432320	0.000000	0.000000	0.000000	0.000000	0.000000	0.000000	0.000000	0.000000	0.000000	0.000000	0.000000	0.000000	0.000000	0.000000	0.000000	0.000000	0.000000	0.000000	0.000000	-100.000000	0.000000	0.000000	0.000000	0.000000	0.000000	0.000000	
1.780000	0.000000	0.000000	0.000000	0.000000	0.000000	0.000000	0.000000	3.273468	0.000000	0.000000	0.000000	0.000000	0.000000	0.000000	0.000000	0.000000	0.000000	0.000000	0.000000	0.000000	0.000000	0.000000	0.000000	0.000000	0.000000	0.000000	0.000000	-100.000000	0.000000	0.000000	0.000000	0.000000	0.000000	0.000000	
1.790000	0.000000	0.000000	0.000000	0.000000	0.000000	0.000000	0.000000	3.107307	0.000000	0.000000	0.000000	0.000000	0.000000	0.000000	0.000000	0.000000	0.000000	0.000000	0.000000	0.000000	0.000000	0.000000	0.000000	0.000000	0.000000	0.000000	0.000000	-100.000000	0.000000	0.000000	0.000000	0.000000	0.000000	0.000000	
1.800000	0.000000	0.000000	0.000000	0.000000	0.000000	0.000000	0.000000	2.933904	0.000000	0.000000	0.000000	0.000000	0.000000	0.000000	0.000000	0.000000	0.000000	0.000000	0.000000	0.000000	0.000000	0.000000	0.000000	0.000000	0.000000	0.000000	0.000000	-100.000000	0.000000	0.000000	0.000000	0.000000	0.000000	0.000000	
1.810000	0.000000	0.000000	0.000000	0.000000	0.000000	0.000000	0.000000	2.753327	0.000000	0.000000	0.000000	0.000000	0.000000	0.000000	0.000000	0.000000	0.000000	0.000000	0.000000	0.000000	0.000000	0.000000	0.000000	0.000000	0.000000	0.000000	0.000000	-100.000000	0.000000	0.000000	0.000000	0.000000	0.000000	0.000000	
1.820000	0.000000	0.000000	0.000000	0.000000	0.000000	0.000000	0.000000	2.565648	0.000000	0.000000	0.000000	0.000000	0.000000	0.000000	0.000000	0.000000	0.000000	0.000000	0.000000	0.000000	0.000000	0.000000	0.000000	0.000000	0.000000	0.000000	0.000000	-100.000000	0.000000	0.000000	0.000000	0.000000	0.000000	0.000000	
1.830000	0.000000	0.000000	0.000000	0.000000	0.000000	0.000000	0.000000	2.370943	0.000000	0.000000	0.000000	0.000000	0.000000	0.000000	0.000000	0.000000	0.000000	0.000000	0.000000	0.000000	0.000000	0.000000	0.000000	0.000000	0.000000	0.000000	0.000000	-100.000000	0.000000	0.000000	0.000000	0.000000	0.000000	0.000000	
1.840000	0.000000	0.000000	0.000000	0.000000	0.000000	0.000000	0.000000	2.169290	0.000000	0.000000	0.000000	0.000000	0.000000	0.000000	0.000000	0.000000	0.000000	0.000000	0.000000	0.000000	0.000000	0.000000	0.000000	0.000000	0.000000	0.000000	0.000000	-100.000000	0.000000	0.000000	0.000000	0.000000	0.000000	0.000000	
1.850000	0.000000	0.000000	0.000000	0.000000	0.000000	0.000000	0.000000	1.960769	0.000000	0.000000	0.000000	0.000000	0.000000	0.000000	0.000000	0.000000	0.000000	0.000000	0.000000	0.000000	0.000000	0.000000	0.000000	0.000000	0.000000	0.000000	0.000000	-100.000000	0.000000	0.000000	0.000000	0.000000	0.000000	0.000000	
1.860000	0.000000	0.000000	0.000000	0.000000	0.000000	0.000000	0.000000	1.745463	0.000000	0.000000	0.000000	0.000000	0.000000	0.000000	0.000000	0.000000	0.000000	0.000000	0.000000	0.000000	0.000000	0.000000	0.000000	0.000000	0.000000	0.000000	0.000000	-100.000000	0.000000	0.000000	0.000000	0.000000	0.000000	0.000000	
1.870000	0.000000	0.000000	0.000000	0.000000	0.000000	0.000000	0.000000	1.523459	0.000000	0.000000	0.000000	0.000000	0.000000	0.000000	0.000000	0.000000	0.000000	0.000000	0.000000	0.000000	0.000000	0.000000	0.000000	0.000000	0.000000	0.000000	0.000000	-100.000000	0.000000	0.000000	0.000000	0.000000	0.000000	0.000000	
1.880000	0.000000	0.000000	0.000000	0.000000	0.000000	0.000000	0.000000	1.294846	0.000000	0.000000	0.000000	0.000000	0.000000	0.000000	0.000000	0.000000	0.000000	0.000000	0.000000	0.000000	0.000000	0.000000	0.000000	0.000000	0.000000	0.000000	0.000000	-100.000000	0.000000	0.000000	0.000000	0.000000	0.000000	0.000000	
1.890000	0.000000	0.000000	0.000000	0.000000	0.000000	0.000000	0.000000	1.059715	0.000000	0.000000	0.000000	0.000000	0.000000	0.000000	0.000000	0.000000	0.000000	0.000000	0.000000	0.000000	0.000000	0.000000	0.000000	0.000000	0.000000	0.000000	0.000000	-100.000000	0.000000	0.000000	0.000000	0.000000	0.000000	0.000000	
1.900000	0.000000	0.000000	0.000000	0.000000	0.000000	0.000000	0.000000	0.818160	0.000000	0.000000	0.000000	0.000000	0.000000	0.000000	0.000000	0.000000	0.000000	0.000000	0.000000	0.000000	0.000000	0.000000	0.000000	0.000000	0.000000	0.000000	0.000000	-100.000000	0.000000	0.000000	0.000000	0.000000	0.000000	0.000000	
1.910000	0.000000	0.000000	0.000000	0.000000	0.000000	0.000000	0.000000	0.570278	0.000000	0.000000	0.000000	0.000000	0.000000	0.000000	0.000000	0.000000	0.000000	0.000000	0.000000	0.000000	0.000000	0.000000	0.000000	0.000000	0.000000	0.000000	0.000000	-100.000000	0.000000	0.000000	0.000000	0.000000	0.000000	0.000000	
1.920000	0.000000	0.000000	0.000000	0.000000	0.000000	0.000000	0.000000	0.316167	0.000000	0.000000	0.000000	0.000000	0.000000	0.000000	0.000000	0.000000	0.000000	0.000000	0.000000	0.000000	0.000000	0.000000	0.000000	0.000000	0.000000	0.000000	0.000000	-100.000000	0.000000	0.000000	0.000000	0.000000	0.000000	0.000000	
1.930000	0.000000	0.000000	0.000000	0.000000	0.000000	0.000000	0.000000	0.055930	0.000000	0.000000	0.000000	0.000000	0.000000	0.000000	0.000000	0.000000	0.000000	0.000000	0.000000	0.000000	0.000000	0.000000	0.000000	0.000000	0.000000	0.000000	0.000000	-100.000000	0.000000	0.000000	0.000000	0.000000	0.000000	0.000000	
1.940000	0.000000	0.000000	0.000000	0.000000	0.000000	0.000000	0.000000	-0.210329	0.000000	0.000000	0.000000	0.000000	0.000000	0.000000	0.000000	0.000000	0.000000	0.000000	0.000000	0.000000	0.000000	0.000000	0.000000	0.000000	0.000000	0.000000	0.000000	-100.000000	0.000000	0.000000	0.000000	0.000000	0.000000	0.000000	
1.950000	0.000000	0.000000	0.000000	0.000000	0.000000	0.000000	0.000000	-0.482505	0.000000	0.000000	0.000000	0.000000	0.000000	0.000000	0.000000	0.000000	0.000000	0.000000	0.000000	0.000000	0.000000	0.000000	0.000000	0.000000	0.000000	0.000000	0.000000	-100.000000	0.000000	0.000000	0.000000	0.000000	0.000000	0.000000	
1.960000	0.000000	0.000000	0.000000	0.000000	0.000000	0.000000	0.000000	-0.760487	0.000000	0.000000	0.000000	0.000000	0.000000	0.000000	0.000000	0.000000	0.000000	0.000000	0.000000	0.000000	0.000000	0.000000	0.000000	0.000000	0.000000	0.000000	0.000000	-100.000000	0.000000	0.000000	0.000000	0.000000	0.000000	0.000000	
1.970000	0.000000	0.000000	0.000000	0.000000	0.000000	0.000000	0.000000	-1.044165	0.000000	0.000000	0.000000	0.000000	0.000000	0.000000	0.000000	0.000000	0.000000	0.000000	0.000000	0.000000	0.000000	0.000000	0.000000	0.000000	0.000000	0.000000	0.000000	-100.000000	0.000000	0.000000	0.000000	0.000000	0.000000	0.000000	
1.980000	0.000000	0.000000	0.000000	0.000000	0.000000	0.000000	0.000000	-1.333426	0.000000	0.000000	0.000000	0.000000	0.000000	0.000000	0.000000	0.000000	0.000000	0.000000	0.000000	0.000000	0.000000	0.000000	0.000000	0.000000	0.000000	0.000000	0.000000	-100.000000	0.000000	0.000000	0.000000	0.000000	0.000000	0.000000	
1.990000	0.000000	0.000000	0.000000	0.000000	0.000000	0.000000	0.000000	-1.628154	0.000000	0.000000	0.000000	0.000000	0.000000	0.000000	0.000000	0.000000	0.000000	0.000000	0.000000	0.000000	0.000000	0.000000	0.000000	0.000000	0.000000	0.000000	0.000000	-100.000000	0.000000	0.000000	0.000000	0.000000	0.000000	0.000000	
2.000000	0.000000	0.000000	0.000000	0.000000	0.000000	0.000000	0.000000	-1.928230	0.000000	0.000000	0.000000	0.000000	0.000000	0.000000	0.000000	0.000000	0.000000	0.000000	0.000000	0.000000	0.000000	0.000000	0.000000	0.000000	0.000000	0.000000	0.000000	-100.000000	0.000000	0.000000	0.000000	0.000000	0.000000	0.000000	
2.010000	0.000000	0.000000	0.000000	0.000000	0.000000	0.000000	0.000000	-2.233535	0.000000	0.000000	0.000000	0.000000	0.000000	0.000000	0.000000	0.000000	0.000000	0.000000	0.000000	0.000000	0.000000	0.000000	0.000000	0.000000	0.000000	0.000000	0.000000	-100.000000	0.000000	0.000000	0.000000	0.000000	0.000000	0.000000	
2.020000	0.000000	0.000000	0.000000	0.000000	0.000000	0.000000	0.000000	-2.543947	0.000000	0.000000	0.000000	0.000000	0.000000	0.000000	0.000000	0.000000	0.000000	0.000000	0.000000	0.000000	0.000000	0.000000	0.000000	0.000000	0.000000	0.000000	0.000000	-100.000000	0.000000	0.000000	0.000000	0.000000	0.000000	0.000000	
2.030000	0.000000	0.000000	0.000000	0.000000	0.000000	0.000000	0.000000	-2.859341	0.000000	0.000000	0.000000	0.000000	0.000000	0.000000	0.000000	0.000000	0.000000	0.000000	0.000000	0.000000	0.000000	0.000000	0.000000	0.000000	0.000000	0.000000	0.000000	-100.000000	0.000000	0.000000	0.000000	0.000000	0.000000	0.000000	
2.040000	0.000000	0.000000	0.000000	0.000000	0.000000	0.000000	0.000000	-3.179592	0.000000	0.000000	0.000000	0.000000	0.000000	0.000000	0.000000	0.000000	0.000000	0.000000	0.000000	0.000000	0.000000	0.000000	0.000000	0.000000	0.000000	0.000000	0.000000	-100.000000	0.000000	0.000000	0.000000	0.000000	0.000000	0.000000	
2.050000	0.000000	0.000000	0.000000	0.000000	0.000000	0.000000	0.000000	-3.504571	0.000000	0.000000	0.000000	0.000000	0.000000	0.000000	0.000000	0.000000	0.000000	0.000000	0.000000	0.000000	0.000000	0.000000	0.000000	0.000000	0.000000	0.000000	0.000000	-100.000000	0.000000	0.000000	0.000000	0.000000	0.000000	0.000000	
2.060000	0.000000	0.000000	0.000000	0.000000	0.000000	0.000000	0.000000	-3.834148	0.000000	0.000000	0.000000	0.000000	0.000000	0.000000	0.000000	0.000000	0.000000	0.000000	0.000000	0.000000	0.000000	0.000000	0.000000	0.000000	0.000000	0.000000	0.000000	-100.000000	0.000000	0.000000	0.000000	0.000000	0.000000	0.000000	
2.070000	0.000000	0.000000	0.000000	0.000000	0.000000	0.000000	0.000000	-4.168192	0.000000	0.000000	0.000000	0.000000	0.000000	0.000000	0.000000	0.000000	0.000000	0.000000	0.000000	0.000000	0.000000	0.000000	0.000000	0.000000	0.000000	0.000000	0.000000	-100.000000	0.000000	0.000000	0.000000	0.000000	0.000000	0.000000	
2.080000	0.000000	0.000000	0.000000	0.000000	0.000000	0.000000	0.000000	-4.506568	0.000000	0.000000	0.000000	0.000000	0.000000	0.000000	0.000000	0.000000	0.000000	0.000000	0.000000	0.000000	0.000000	0.000000	0.000000	0.000000	0.000000	0.000000	0.000000	-100.000000	0.000000	0.000000	0.000000	0.000000	0.000000	0.000000	
2.090000	0.000000	0.000000	0.000000	0.000000	0.000000	0.000000	0.000000	-4.849143	0.000000	0.000000	0.000000	0.000000	0.000000	0.000000	0.000000	0.000000	0.000000	0.000000	0.000000	0.000000	0.000000	0.000000	0.000000	0.000000	0.000000	0.000000	0.000000	-100.000000	0.000000	0.000000	0.000000	0.000000	0.000000	0.000000	
2.100000	0.000000	0.000000	0.000000	0.000000	0.000000	0.000000	0.000000	-5.195777	0.000000	0.000000	0.000000	0.000000	0.000000	0.000000	0.000000	0.000000	0.000000	0.000000	0.000000	0.000000	0.000000	0.000000	0.000000	0.000000	0.000000	0.000000	0.000000	-100.000000	0.000000	0.000000	0.000000	0.000000	0.000000	0.000000	
2.110000	0.000000	0.000000	0.000000	0.000000	0.000000	0.000000	0.000000	-5.546333	0.000000	0.000000	0.000000	0.000000	0.000000	0.000000	0.000000	0.000000	0.000000	0.000000	0.000000	0.000000	0.000000	0.000000	0.000000	0.000000	0.000000	0.000000	0.000000	-100.000000	0.000000	0.000000	0.000000	0.000000	0.000000	0.000000	
2.120000	0.000000	0.000000	0.000000	0.000000	0.000000	0.000000	0.000000	-5.900671	0.000000	0.000000	0.000000	0.000000	0.000000	0.000000	0.000000	0.000000	0.000000	0.000000	0.000000	0.000000	0.000000	0.000000	0.000000	0.000000	0.000000	0.000000	0.000000	-100.000000	0.000000	0.000000	0.000000	0.000000	0.000000	0.000000	
2.130000	0.000000	0.000000	0.000000	0.000000	0.000000	0.000000	0.000000	-6.258649	0.000000	0.000000	0.000000	0.000000	0.000000	0.000000	0.000000	0.000000	0.000000	0.000000	0.000000	0.000000	0.000000	0.000000	0.000000	0.000000	0.000000	0.000000	0.000000	-100.000000	0.000000	0.000000	0.000000	0.000000	0.000000	0.000000	
2.140000	0.000000	0.000000	0.000000	0.000000	0.000000	0.000000	0.000000	-6.620124	0.000000	0.000000	0.000000	0.000000	0.000000	0.000000	0.000000	0.000000	0.000000	0.000000	0.000000	0.000000	0.000000	0.000000	0.000000	0.000000	0.000000	0.000000	0.000000	-100.000000	0.000000	0.000000	0.000000	0.000000	0.000000	0.000000	
2.150000	0.000000	0.000000	0.000000	0.000000	0.000000	0.000000	0.000000	-6.984950	0.000000	0.000000	0.000000	0.000000	0.000000	0.000000	0.000000	0.000000	0.000000	0.000000	0.000000	0.000000	0.000000	0.000000	0.000000	0.000000	0.000000	0.000000	0.000000	-100.000000	0.000000	0.000000	0.000000	0.000000	0.000000	0.000000	
2.160000	0.000000	0.000000	0.000000	0.000000	0.000000	0.000000	0.000000	-7.352983	0.000000	0.000000	0.000000	0.000000	0.000000	0.000000	0.000000	0.000000	0.000000	0.000000	0.000000	0.000000	0.000000	0.000000	0.000000	0.000000	0.000000	0.000000	0.000000	-100.000000	0.000000	0.000000	0.000000	0.000000	0.000000	0.000000	
2.170000	0.000000	0.000000	0.000000	0.000000	0.000000	0.000000	0.000000	-7.724075	0.000000	0.000000	0.000000	0.000000	0.000000	0.000000	0.000000	0.000000	0.000000	0.000000	0.000000	0.000000	0.000000	0.000000	0.000000	0.000000	0.000000	0.000000	0.000000	-100.000000	0.000000	0.000000	0.000000	0.000000	0.000000	0.000000	
2.180000	0.000000	0.000000	0.000000	0.000000	0.000000	0.000000	0.000000	-8.098077	0.000000	0.000000	0.000000	0.000000	0.000000	0.000000	0.000000	0.000000	0.000000	0.000000	0.000000	0.000000	0.000000	0.000000	0.000000	0.000000	0.000000	0.000000	0.000000	-100.000000	0.000000	0.000000	0.000000	0.000000	0.000000	0.000000	
2.190000	0.000000	0.000000	0.000000	0.000000	0.000000	0.000000	0.000000	-8.474841	0.000000	0.000000	0.000000	0.000000	0.000000	0.000000	0.000000	0.000000	0.000000	0.000000	0.000000	0.000000	0.000000	0.000000	0.000000	0.000000	0.000000	0.000000	0.000000	-100.000000	0.000000	0.000000	0.000000	0.000000	0.000000	0.000000	
2.200000	0.000000	0.000000	0.000000	0.000000	0.000000	0.000000	0.000000	-8.854214	0.000000	0.000000	0.000000	0.000000	0.000000	0.000000	0.000000	0.000000	0.000000	0.000000	0.000000	0.000000	0.000000	0.000000	0.000000	0.000000	0.000000	0.000000	0.000000	-100.000000	0.000000	0.000000	0.000000	0.000000	0.000000	0.000000	
2.210000	0.000000	0.000000	0.000000	0.000000	0.000000	0.000000	0.000000	-9.236046	0.000000	0.000000	0.000000	0.000000	0.000000	0.000000	0.000000	0.000000	0.000000	0.000000	0.000000	0.000000	0.000000	0.000000	0.000000	0.000000	0.000000	0.000000	0.000000	-100.000000	0.000000	0.000000	0.000000	0.000000	0.000000	0.000000	
2.220000	0.000000	0.000000	0.000000	0.000000	0.000000	0.000000	0.000000	-9.620184	0.000000	0.000000	0.000000	0.000000	0.000000	0.000000	0.000000	0.000000	0.000000	0.000000	0.000000	0.000000	0.000000	0.000000	0.000000	0.000000	0.000000	0.000000	0.000000	-100.000000	0.000000	0.000000	0.000000	0.000000	0.000000	0.000000	
2.230000	0.000000	0.000000	0.000000	0.000000	0.000000	0.000000	0.000000	-10.006474	0.000000	0.000000	0.000000	0.000000	0.000000	0.000000	0.000000	0.000000	0.000000	0.000000	0.000000	0.000000	0.000000	0.000000	0.000000	0.000000	0.000000	0.000000	0.000000	-100.000000	0.000000	0.000000	0.000000	0.000000	0.000000	0.000000	
2.240000	0.000000	0.000000	0.000000	0.000000	0.000000	0.000000	0.000000	-10.394761	0.000000	0.000000	0.000000	0.000000	0.000000	0.000000	0.000000	0.000000	0.000000	0.000000	0.000000	0.000000	0.000000	0.000000	0.000000	0.000000	0.000000	0.000000	0.000000	-100.000000	0.000000	0.000000	0.000000	0.000000	0.000000	0.000000	
2.250000	0.000000	0.000000	0.000000	0.000000	0.000000	0.000000	0.000000	-10.784891	0.000000	0.000000	0.000000	0.000000	0.000000	0.000000	0.000000	0.000000	0.000000	0.000000	0.000000	0.000000	0.000000	0.000000	0.000000	0.000000	0.000000	0.000000	0.000000	-100.000000	0.000000	0.000000	0.000000	0.000000	0.000000	0.000000	
2.260000	0.000000	0.000000	0.000000	0.000000	0.000000	0.000000	0.000000	-11.176707	0.000000	0.000000	0.000000	0.000000	0.000000	0.000000	0.000000	0.000000	0.000000	0.000000	0.000000	0.000000	0.000000	0.000000	0.000000	0.000000	0.000000	0.000000	0.000000	-100.000000	0.000000	0.000000	0.000000	0.000000	0.000000	0.000000	
2.270000	0.000000	0.000000	0.000000	0.000000	0.000000	0.000000	0.000000	-11.570053	0.000000	0.000000	0.000000	0.000000	0.000000	0.000000	0.000000	0.000000	0.000000	0.000000	0.000000	0.000000	0.000000	0.000000	0.000000	0.000000	0.000000	0.000000	0.000000	-100.000000	0.000000	0.000000	0.000000	0.000000	0.000000	0.000000	
2.280000	0.000000	0.000000	0.000000	0.000000	0.000000	0.000000	0.000000	-11.964771	0.000000	0.000000	0.000000	0.000000	0.000000	0.000000	0.000000	0.000000	0.000000	0.000000	0.000000	0.000000	0.000000	0.000000	0.000000	0.000000	0.000000	0.000000	0.000000	-100.000000	0.000000	0.000000	0.000000	0.000000	0.000000	0.000000	
2.290000	0.000000	0.000000	0.000000	0.000000	0.000000	0.000000	0.000000	-12.360703	0.000000	0.000000	0.000000	0.000000	0.000000	0.000000	0.000000	0.000000	0.000000	0.000000	0.000000	0.000000	0.000000	0.000000	0.000000	0.000000	0.000000	0.000000	0.000000	-100.000000	0.000000	0.000000	0.000000	0.000000	0.000000	0.000000	
2.300000	0.000000	0.000000	0.000000	0.000000	0.000000	0.000000	0.000000	-12.757691	0.000000	0.000000	0.000000	0.000000	0.000000	0.000000	0.000000	0.000000	0.000000	0.000000	0.000000	0.000000	0.000000	0.000000	0.000000	0.000000	0.000000	0.000000	0.000000	-100.000000	0.000000	0.000000	0.000000	0.000000	0.000000	0.000000	
2.310000	0.000000	0.000000	0.000000	0.000000	0.000000	0.000000	0.000000	-13.155576	0.000000	0.000000	0.000000	0.000000	0.000000	0.000000	0.000000	0.000000	0.000000	0.000000	0.000000	0.000000	0.000000	0.000000	0.000000	0.000000	0.000000	0.000000	0.000000	-100.000000	0.000000	0.000000	0.000000	0.000000	0.000000	0.000000	
2.320000	0.000000	0.000000	0.000000	0.000000	0.000000	0.000000	0.000000	-13.554199	0.000000	0.000000	0.000000	0.000000	0.000000	0.000000	0.000000	0.000000	0.000000	0.000000	0.000000	0.000000	0.000000	0.000000	0.000000	0.000000	0.000000	0.000000	0.000000	-100.000000	0.000000	0.000000	0.000000	0.000000	0.000000	0.000000	
2.330000	0.000000	0.000000	0.000000	0.000000	0.000000	0.000000	0.000000	-13.953401	0.000000	0.000000	0.000000	0.000000	0.000000	0.000000	0.000000	0.000000	0.000000	0.000000	0.000000	0.000000	0.000000	0.000000	0.000000	0.000000	0.000000	0.000000	0.000000	-100.000000	0.000000	0.000000	0.000000	0.000000	0.000000	0.000000	
2.340000	0.000000	0.000000	0.000000	0.000000	0.000000	0.000000	0.000000	-14.353022	0.000000	0.000000	0.000000	0.000000	0.000000	0.000000	0.000000	0.000000	0.000000	0.000000	0.000000	0.000000	0.000000	0.000000	0.000000	0.000000	0.000000	0.000000	0.000000	-100.000000	0.000000	0.000000	0.000000	0.000000	0.000000	0.000000	
2.350000	0.000000	0.000000	0.000000	0.000000	0.000000	0.000000	0.000000	-14.752902	0.000000	0.000000	0.000000	0.000000	0.000000	0.000000	0.000000	0.000000	0.000000	0.000000	0.000000	0.000000	0.000000	0.000000	0.000000	0.000000	0.000000	0.000000	0.000000	-100.000000	0.000000	0.000000	0.000000	0.000000	0.000000	0.000000	
2.360000	0.000000	0.000000	0.000000	0.000000	0.000000	0.000000	0.000000	-15.152881	0.000000	0.000000	0.000000	0.000000	0.000000	0.000000	0.000000	0.000000	0.000000	0.000000	0.000000	0.000000	0.000000	0.000000	0.000000	0.000000	0.000000	0.000000	0.000000	-100.000000	0.000000	0.000000	0.000000	0.000000	0.000000	0.000000	
2.370000	0.000000	0.000000	0.000000	0.000000	0.000000	0.000000	0.000000	-15.552798	0.000000	0.000000	0.000000	0.000000	0.000000	0.000000	0.000000	0.000000	0.000000	0.000000	0.000000	0.000000	0.000000	0.000000	0.000000	0.000000	0.000000	0.000000	0.000000	-100.000000	0.000000	0.000000	0.000000	0.000000	0.000000	0.000000	
2.380000	0.000000	0.000000	0.000000	0.000000	0.000000	0.000000	0.000000	-15.952496	0.000000	0.000000	0.000000	0.000000	0.000000	0.000000	0.000000	0.000000	0.000000	0.000000	0.000000	0.000000	0.000000	0.000000	0.000000	0.000000	0.000000	0.000000	0.000000	-100.000000	0.000000	0.000000	0.000000	0.000000	0.000000	0.000000	
2.390000	0.000000	0.000000	0.000000	0.000000	0.000000	0.000000	0.000000	-16.351812	0.000000	0.000000	0.000000	0.000000	0.000000	0.000000	0.000000	0.000000	0.000000	0.000000	0.000000	0.000000	0.000000	0.000000	0.000000	0.000000	0.000000	0.000000	0.000000	-100.000000	0.000000	0.000000	0.000000	0.000000	0.000000	0.000000	
2.400000	0.000000	0.000000	0.000000	0.000000	0.000000	0.000000	0.000000	-16.750588	0.000000	0.000000	0.000000	0.000000	0.000000	0.000000	0.000000	0.000000	0.000000	0.000000	0.000000	0.000000	0.000000	0.000000	0.000000	0.000000	0.000000	0.000000	0.000000	-100.000000	0.000000	0.000000	0.000000	0.000000	0.000000	0.000000	
2.410000	0.000000	0.000000	0.000000	0.000000	0.000000	0.000000	0.000000	-17.148664	0.000000	0.000000	0.000000	0.000000	0.000000	0.000000	0.000000	0.000000	0.000000	0.000000	0.000000	0.000000	0.000000	0.000000	0.000000	0.000000	0.000000	0.000000	0.000000	-100.000000	0.000000	0.000000	0.000000	0.000000	0.000000	0.000000	
2.420000	0.000000	0.000000	0.000000	0.000000	0.000000	0.000000	0.000000	-17.545881	0.000000	0.000000	0.000000	0.000000	0.000000	0.000000	0.000000	0.000000	0.000000	0.000000	0.000000	0.000000	0.000000	0.000000	0.000000	0.000000	0.000000	0.000000	0.000000	-100.000000	0.000000	0.000000	0.000000	0.000000	0.000000	0.000000	
2.430000	0.000000	0.000000	0.000000	0.000000	0.000000	0.000000	0.000000	-17.942080	0.000000	0.000000	0.000000	0.000000	0.000000	0.000000	0.000000	0.000000	0.000000	0.000000	0.000000	0.000000	0.000000	0.000000	0.000000	0.000000	0.000000	0.000000	0.000000	-100.000000	0.000000	0.000000	0.000000	0.000000	0.000000	0.000000	
2.440000	0.000000	0.000000	0.000000	0.000000	0.000000	0.000000	0.000000	-18.337102	0.000000	0.000000	0.000000	0.000000	0.000000	0.000000	0.000000	0.000000	0.000000	0.000000	0.000000	0.000000	0.000000	0.000000	0.000000	0.000000	0.000000	0.000000	0.000000	-100.000000	0.000000	0.000000	0.000000	0.000000	0.000000	0.000000	
2.450000	0.000000	0.000000	0.000000	0.000000	0.000000	0.000000	0.000000	-18.730790	0.000000	0.000000	0.000000	0.000000	0.000000	0.000000	0.000000	0.000000	0.000000	0.000000	0.000000	0.000000	0.000000	0.000000	0.000000	0.000000	0.000000	0.000000	0.000000	-100.000000	0.000000	0.000000	0.000000	0.000000	0.000000	0.000000	
2.460000	0.000000	0.000000	0.000000	0.000000	0.000000	0.000000	0.000000	-19.122985	0.000000	0.000000	0.000000	0.000000	0.000000	0.000000	0.000000	0.000000	0.000000	0.000000	0.000000	0.000000	0.000000	0.000000	0.000000	0.000000	0.000000	0.000000	0.000000	-100.000000	0.000000	0.000000	0.000000	0.000000	0.000000	0.000000	
2.470000	0.000000	0.000000	0.000000	0.000000	0.000000	0.000000	0.000000	-19.513532	0.000000	0.000000	0.000000	0.000000	0.000000	0.000000	0.000000	0.000000	0.000000	0.000000	0.000000	0.000000	0.000000	0.000000	0.000000	0.000000	0.000000	0.000000	0.000000	-100.000000	0.000000	0.000000	0.000000	0.000000	0.000000	0.000000	
2.480000	0.000000	0.000000	0.000000	0.000000	0.000000	0.000000	0.000000	-19.902274	0.000000	0.000000	0.000000	0.000000	0.000000	0.000000	0.000000	0.000000	0.000000	0.000000	0.000000	0.000000	0.000000	0.000000	0.000000	0.000000	0.000000	0.000000	0.000000	-100.000000	0.000000	0.000000	0.000000	0.000000	0.000000	0.000000	
2.490000	0.000000	0.000000	0.000000	0.000000	0.000000	0.000000	0.000000	-20.289055	0.000000	0.000000	0.000000	0.000000	0.000000	0.000000	0.000000	0.000000	0.000000	0.000000	0.000000	0.000000	0.000000	0.000000	0.000000	0.000000	0.000000	0.000000	0.000000	-100.000000	0.000000	0.000000	0.000000	0.000000	0.000000	0.000000	
2.500000	0.000000	0.000000	0.000000	0.000000	0.000000	0.000000	0.000000	-20.673721	0.000000	0.000000	0.000000	0.000000	0.000000	0.000000	0.000000	0.000000	0.000000	0.000000	0.000000	0.000000	0.000000	0.000000	0.000000	0.000000	0.000000	0.000000	0.000000	-100.000000	0.000000	0.000000	0.000000	0.000000	0.000000	0.000000	
2.510000	0.000000	0.000000	0.000000	0.000000	0.000000	0.000000	0.000000	-21.056118	0.000000	0.000000	0.000000	0.000000	0.000000	0.000000	0.000000	0.000000	0.000000	0.000000	0.000000	0.000000	0.000000	0.000000	0.000000	0.000000	0.000000	0.000000	0.000000	-100.000000	0.000000	0.000000	0.000000	0.000000	0.000000	0.000000	
2.520000	0.000000	0.000000	0.000000	0.000000	0.000000	0.000000	0.000000	-21.436093	0.000000	0.000000	0.000000	0.000000	0.000000	0.000000	0.000000	0.000000	0.000000	0.000000	0.000000	0.000000	0.000000	0.000000	0.000000	0.000000	0.000000	0.000000	0.000000	-100.000000	0.000000	0.000000	0.000000	0.000000	0.000000	0.000000	
2.530000	0.000000	0.000000	0.000000	0.000000	0.000000	0.000000	0.000000	-21.813493	0.000000	0.000000	0.000000	0.000000	0.000000	0.000000	0.000000	0.000000	0.000000	0.000000	0.000000	0.000000	0.000000	0.000000	0.000000	0.000000	0.000000	0.000000	0.000000	-100.000000	0.000000	0.000000	0.000000	0.000000	0.000000	0.000000	
2.540000	0.000000	0.000000	0.000000	0.000000	0.000000	0.000000	0.000000	-22.188169	0.000000	0.000000	0.000000	0.000000	0.000000	0.000000	0.000000	0.000000	0.000000	0.000000	0.000000	0.000000	0.000000	0.000000	0.000000	0.000000	0.000000	0.000000	0.000000	-100.000000	0.000000	0.000000	0.000000	0.000000	0.000000	0.000000	
2.550000	0.000000	0.000000	0.000000	0.000000	0.000000	0.000000	0.000000	-22.559970	0.000000	0.000000	0.000000	0.000000	0.000000	0.000000	0.000000	0.000000	0.000000	0.000000	0.000000	0.000000	0.000000	0.000000	0.000000	0.000000	0.000000	0.000000	0.000000	-100.000000	0.000000	0.000000	0.000000	0.000000	0.000000	0.000000	
2.560000	0.000000	0.000000	0.000000	0.000000	0.000000	0.000000	0.000000	-22.928747	0.000000	0.000000	0.000000	0.000000	0.000000	0.000000	0.000000	0.000000	0.000000	0.000000	0.000000	0.000000	0.000000	0.000000	0.000000	0.000000	0.000000	0.000000	0.000000	-100.000000	0.000000	0.000000	0.000000	0.000000	0.000000	0.000000	
2.570000	0.000000	0.000000	0.000000	0.000000	0.000000	0.000000	0.000000	-23.294352	0.000000	0.000000	0.000000	0.000000	0.000000	0.000000	0.000000	0.000000	0.000000	0.000000	0.000000	0.000000	0.000000	0.000000	0.000000	0.000000	0.000000	0.000000	0.000000	-100.000000	0.000000	0.000000	0.000000	0.000000	0.000000	0.000000	
2.580000	0.000000	0.000000	0.000000	0.000000	0.000000	0.000000	0.000000	-23.656641	0.000000	0.000000	0.000000	0.000000	0.000000	0.000000	0.000000	0.000000	0.000000	0.000000	0.000000	0.000000	0.000000	0.000000	0.000000	0.000000	0.000000	0.000000	0.000000	-100.000000	0.000000	0.000000	0.000000	0.000000	0.000000	0.000000	
2.590000	0.000000	0.000000	0.000000	0.000000	0.000000	0.000000	0.000000	-24.015467	0.000000	0.000000	0.000000	0.000000	0.000000	0.000000	0.000000	0.000000	0.000000	0.000000	0.000000	0.000000	0.000000	0.000000	0.000000	0.000000	0.000000	0.000000	0.000000	-100.000000	0.000000	0.000000	0.000000	0.000000	0.000000	0.000000	
2.600000	0.000000	0.000000	0.000000	0.000000	0.000000	0.000000	0.000000	-24.370688	0.000000	0.000000	0.000000	0.000000	0.000000	0.000000	0.000000	0.000000	0.000000	0.000000	0.000000	0.000000	0.000000	0.000000	0.000000	0.000000	0.000000	0.000000	0.000000	-100.000000	0.000000	0.000000	0.000000	0.000000	0.000000	0.000000	
2.610000	0.000000	0.000000	0.000000	0.000000	0.000000	0.000000	0.000000	-24.722160	0.000000	0.000000	0.000000	0.000000	0.000000	0.000000	0.000000	0.000000	0.000000	0.000000	0.000000	0.000000	0.000000	0.000000	0.000000	0.000000	0.000000	0.000000	0.000000	-100.000000	0.000000	0.000000	0.000000	0.000000	0.000000	0.000000	
2.620000	0.000000	0.000000	0.000000	0.000000	0.000000	0.000000	0.000000	-25.069744	0.000000	0.000000	0.000000	0.000000	0.000000	0.000000	0.000000	0.000000	0.000000	0.000000	0.000000	0.000000	0.000000	0.000000	0.000000	0.000000	0.000000	0.000000	0.000000	-100.000000	0.000000	0.000000	0.000000	0.000000	0.000000	0.000000	
2.630000	0.000000	0.000000	0.000000	0.000000	0.000000	0.000000	0.000000	-25.413301	0.000000	0.000000	0.000000	0.000000	0.000000	0.000000	0.000000	0.000000	0.000000	0.000000	0.000000	0.000000	0.000000	0.000000	0.000000	0.000000	0.000000	0.000000	0.000000	-100.000000	0.000000	0.000000	0.000000	0.000000	0.000000	0.000000	
2.640000	0.000000	0.000000	0.000000	0.000000	0.000000	0.000000	0.000000	-25.752693	0.000000	0.000000	0.000000	0.000000	0.000000	0.000000	0.000000	0.000000	0.000000	0.000000	0.000000	0.000000	0.000000	0.000000	0.000000	0.000000	0.000000	0.000000	0.000000	-100.000000	0.000000	0.000000	0.000000	0.000000	0.000000	0.000000	
2.650000	0.000000	0.000000	0.000000	0.000000	0.000000	0.000000	0.000000	-26.087784	0.000000	0.000000	0.000000	0.000000	0.000000	0.000000	0.000000	0.000000	0.000000	0.000000	0.000000	0.000000	0.000000	0.000000	0.000000	0.000000	0.000000	0.000000	0.000000	-100.000000	0.000000	0.000000	0.000000	0.000000	0.000000	0.000000	
2.660000	0.000000	0.000000	0.000000	0.000000	0.000000	0.000000	0.000000	-26.418440	0.000000	0.000000	0.000000	0.000000	0.000000	0.000000	0.000000	0.000000	0.000000	0.000000	0.000000	0.000000	0.000000	0.000000	0.000000	0.000000	0.000000	0.000000	0.000000	-100.000000	0.000000	0.000000	0.000000	0.000000	0.000000	0.000000	
2.670000	0.000000	0.000000	0.000000	0.000000	0.000000	0.000000	0.000000	-26.744530	0.000000	0.000000	0.000000	0.000000	0.000000	0.000000	0.000000	0.000000	0.000000	0.000000	0.000000	0.000000	0.000000	0.000000	0.000000	0.000000	0.000000	0.000000	0.000000	-100.000000	0.000000	0.000000	0.000000	0.000000	0.000000	0.000000	
2.680000	0.000000	0.000000	0.000000	0.000000	0.000000	0.000000	0.000000	-27.065922	0.000000	0.000000	0.000000	0.000000	0.000000	0.000000	0.000000	0.000000	0.000000	0.000000	0.000000	0.000000	0.000000	0.000000	0.000000	0.000000	0.000000	0.000000	0.000000	-100.000000	0.000000	0.000000	0.000000	0.000000	0.000000	0.000000	
2.690000	0.000000	0.000000	0.000000	0.000000	0.000000	0.000000	0.000000	-27.382488	0.000000	0.000000	0.000000	0.000000	0.000000	0.000000	0.000000	0.000000	0.000000	0.000000	0.000000	0.000000	0.000000	0.000000	0.000000	0.000000	0.000000	0.000000	0.000000	-100.000000	0.000000	0.000000	0.000000	0.000000	0.000000	0.000000	
2.700000	0.000000	0.000000	0.000000	0.000000	0.000000	0.000000	0.000000	-27.694101	0.000000	0.000000	0.000000	0.000000	0.000000	0.000000	0.000000	0.000000	0.000000	0.000000	0.000000	0.000000	0.000000	0.000000	0.000000	0.000000	0.000000	0.000000	0.000000	-100.000000	0.000000	0.000000	0.000000	0.000000	0.000000	0.000000	
2.710000	0.000000	0.000000	0.000000	0.000000	0.000000	0.000000	0.000000	-28.000637	0.000000	0.000000	0.000000	0.000000	0.000000	0.000000	0.000000	0.000000	0.000000	0.000000	0.000000	0.000000	0.000000	0.000000	0.000000	0.000000	0.000000	0.000000	0.000000	-100.000000	0.000000	0.000000	0.000000	0.000000	0.000000	0.000000	
2.720000	0.000000	0.000000	0.000000	0.000000	0.000000	0.000000	0.000000	-28.301974	0.000000	0.000000	0.000000	0.000000	0.000000	0.000000	0.000000	0.000000	0.000000	0.000000	0.000000	0.000000	0.000000	0.000000	0.000000	0.000000	0.000000	0.000000	0.000000	-100.000000	0.000000	0.000000	0.000000	0.000000	0.000000	0.000000	
2.730000	0.000000	0.000000	0.000000	0.000000	0.000000	0.000000	0.000000	-28.597990	0.000000	0.000000	0.000000	0.000000	0.000000	0.000000	0.000000	0.000000	0.000000	0.000000	0.000000	0.000000	0.000000	0.000000	0.000000	0.000000	0.000000	0.000000	0.000000	-100.000000	0.000000	0.000000	0.000000	0.000000	0.000000	0.000000	
2.740000	0.000000	0.000000	0.000000	0.000000	0.000000	0.000000	0.000000	-28.888567	0.000000	0.000000	0.000000	0.000000	0.000000	0.000000	0.000000	0.000000	0.000000	0.000000	0.000000	0.000000	0.000000	0.000000	0.000000	0.000000	0.000000	0.000000	0.000000	-100.000000	0.000000	0.000000	0.000000	0.000000	0.000000	0.000000	
2.750000	0.000000	0.000000	0.000000	0.000000	0.000000	0.000000	0.000000	-29.173590	0.000000	0.000000	0.000000	0.000000	0.000000	0.000000	0.000000	0.000000	0.000000	0.000000	0.000000	0.000000	0.000000	0.000000	0.000000	0.000000	0.000000	0.000000	0.000000	-100.000000	0.000000	0.000000	0.000000	0.000000	0.000000	0.000000	
2.760000	0.000000	0.000000	0.000000	0.000000	0.000000	0.000000	0.000000	-29.452943	0.000000	0.000000	0.000000	0.000000	0.000000	0.000000	0.000000	0.000000	0.000000	0.000000	0.000000	0.000000	0.000000	0.000000	0.000000	0.000000	0.000000	0.000000	0.000000	-100.000000	0.000000	0.000000	0.000000	0.000000	0.000000	0.000000	
2.770000	0.000000	0.000000	0.000000	0.000000	0.000000	0.000000	0.000000	-29.726516	0.000000	0.000000	0.000000	0.000000	0.000000	0.000000	0.000000	0.000000	0.000000	0.000000	0.000000	0.000000	0.000000	0.000000	0.000000	0.000000	0.000000	0.000000	0.000000	-100.000000	0.000000	0.000000	0.000000	0.000000	0.000000	0.000000	
2.780000	0.000000	0.000000	0.000000	0.000000	0.000000	0.000000	0.000000	-29.994198	0.000000	0.000000	0.000000	0.000000	0.000000	0.000000	0.000000	0.000000	0.000000	0.000000	0.000000	0.000000	0.000000	0.000000	0.000000	0.000000	0.000000	0.000000	0.000000	-100.000000	0.000000	0.000000	0.000000	0.000000	0.000000	0.000000	
2.790000	0.000000	0.000000	0.000000	0.000000	0.000000	0.000000	0.000000	-30.255884	0.000000	0.000000	0.000000	0.000000	0.000000	0.000000	0.000000	0.000000	0.000000	0.000000	0.000000	0.000000	0.000000	0.000000	0.000000	0.000000	0.000000	0.000000	0.000000	-100.000000	0.000000	0.000000	0.000000	0.000000	0.000000	0.000000	
2.800000	0.000000	0.000000	0.000000	0.000000	0.000000	0.000000	0.000000	-30.511467	0.000000	0.000000	0.000000	0.000000	0.000000	0.000000	0.000000	0.000000	0.000000	0.000000	0.000000	0.000000	0.000000	0.000000	0.000000	0.000000	0.000000	0.000000	0.000000	-100.000000	0.000000	0.000000	0.000000	0.000000	0.000000	0.000000	
2.810000	0.000000	0.000000	0.000000	0.000000	0.000000	0.000000	0.000000	-30.760847	0.000000	0.000000	0.000000	0.000000	0.000000	0.000000	0.000000	0.000000	0.000000	0.000000	0.000000	0.000000	0.000000	0.000000	0.000000	0.000000	0.000000	0.000000	0.000000	-100.000000	0.000000	0.000000	0.000000	0.000000	0.000000	0.000000	
2.820000	0.000000	0.000000	0.000000	0.000000	0.000000	0.000000	0.000000	-31.003922	0.000000	0.000000	0.000000	0.000000	0.000000	0.000000	0.000000	0.000000	0.000000	0.000000	0.000000	0.000000	0.000000	0.000000	0.000000	0.000000	0.000000	0.000000	0.000000	-100.000000	0.000000	0.000000	0.000000	0.000000	0.000000	0.000000	
2.830000	0.000000	0.000000	0.000000	0.000000	0.000000	0.000000	0.000000	-31.240596	0.000000	0.000000	0.000000	0.000000	0.000000	0.000000	0.000000	0.000000	0.000000	0.000000	0.000000	0.000000	0.000000	0.000000	0.000000	0.000000	0.000000	0.000000	0.000000	-100.000000	0.000000	0.000000	0.000000	0.000000	0.000000	0.000000	
2.840000	0.000000	0.000000	0.000000	0.000000	0.000000	0.000000	0.000000	-31.470775	0.000000	0.000000	0.000000	0.000000	0.000000	0.000000	0.000000	0.000000	0.000000	0.000000	0.000000	0.000000	0.000000	0.000000	0.000000	0.000000	0.000000	0.000000	0.000000	-100.000000	0.000000	0.000000	0.000000	0.000000	0.000000	0.000000	
2.850000	0.000000	0.000000	0.000000	0.000000	0.000000	0.000000	0.000000	-31.694366	0.000000	0.000000	0.000000	0.000000	0.000000	0.000000	0.000000	0.000000	0.000000	0.000000	0.000000	0.000000	0.000000	0.000000	0.000000	0.000000	0.000000	0.000000	0.000000	-100.000000	0.000000	0.000000	0.000000	0.000000	0.000000	0.000000	
2.860000	0.000000	0.000000	0.000000	0.000000	0.000000	0.000000	0.000000	-31.911279	0.000000	0.000000	0.000000	0.000000	0.000000	0.000000	0.000000	0.000000	0.000000	0.000000	0.000000	0.000000	0.000000	0.000000	0.000000	0.000000	0.000000	0.000000	0.000000	-100.000000	0.000000	0.000000	0.000000	0.000000	0.000000	0.000000	
2.870000	0.000000	0.000000	0.000000	0.000000	0.000000	0.000000	0.000000	-32.121429	0.000000	0.000000	0.000000	0.000000	0.000000	0.000000	0.000000	0.000000	0.000000	0.000000	0.000000	0.000000	0.000000	0.000000	0.000000	0.000000	0.000000	0.000000	0.000000	-100.000000	0.000000	0.000000	0.000000	0.000000	0.000000	0.000000	
2.880000	0.000000	0.000000	0.000000	0.000000	0.000000	0.000000	0.000000	-32.324730	0.000000	0.000000	0.000000	0.000000	0.000000	0.000000	0.000000	0.000000	0.000000	0.000000	0.000000	0.000000	0.000000	0.000000	0.000000	0.000000	0.000000	0.000000	0.000000	-100.000000	0.000000	0.000000	0.000000	0.000000	0.000000	0.000000	
2.890000	0.000000	0.000000	0.000000	0.000000	0.000000	0.000000	0.000000	-32.521103	0.000000	0.000000	0.000000	0.000000	0.000000	0.000000	0.000000	0.000000	0.000000	0.000000	0.000000	0.000000	0.000000	0.000000	0.000000	0.000000	0.000000	0.000000	0.000000	-100.000000	0.000000	0.000000	0.000000	0.000000	0.000000	0.000000	
2.900000	0.000000	0.000000	0.000000	0.000000	0.000000	0.000000	0.000000	-32.710467	0.000000	0.000000	0.000000	0.000000	0.000000	0.000000	0.000000	0.000000	0.000000	0.000000	0.000000	0.000000	0.000000	0.000000	0.000000	0.000000	0.000000	0.000000	0.000000	-100.000000	0.000000	0.000000	0.000000	0.000000	0.000000	0.000000	
2.910000	0.000000	0.000000	0.000000	0.000000	0.000000	0.000000	0.000000	-32.892747	0.000000	0.000000	0.000000	0.000000	0.000000	0.000000	0.000000	0.000000	0.000000	0.000000	0.000000	0.000000	0.000000	0.000000	0.000000	0.000000	0.000000	0.000000	0.000000	-100.000000	0.000000	0.000000	0.000000	0.000000	0.000000	0.000000	
2.920000	0.000000	0.000000	0.000000	0.000000	0.000000	0.000000	0.000000	-33.067871	0.000000	0.000000	0.000000	0.000000	0.000000	0.000000	0.000000	0.000000	0.000000	0.000000	0.000000	0.000000	0.000000	0.000000	0.000000	0.000000	0.000000	0.000000	0.000000	-100.000000	0.000000	0.000000	0.000000	0.000000	0.000000	0.000000	
2.930000	0.000000	0.000000	0.000000	0.000000	0.000000	0.000000	0.000000	-33.235768	0.000000	0.000000	0.000000	0.000000	0.000000	0.000000	0.000000	0.000000	0.000000	0.000000	0.000000	0.000000	0.000000	0.000000	0.000000	0.000000	0.000000	0.000000	0.000000	-100.000000	0.000000	0.000000	0.000000	0.000000	0.000000	0.000000	
2.940000	0.000000	0.000000	0.000000	0.000000	0.000000	0.000000	0.000000	-33.396372	0.000000	0.000000	0.000000	0.000000	0.000000	0.000000	0.000000	0.000000	0.000000	0.000000	0.000000	0.000000	0.000000	0.000000	0.000000	0.000000	0.000000	0.000000	0.000000	-100.000000	0.000000	0.000000	0.000000	0.000000	0.000000	0.000000	
2.950000	0.000000	0.000000	0.000000	0.000000	0.000000	0.000000	0.000000	-33.549617	0.000000	0.000000	0.000000	0.000000	0.000000	0.000000	0.000000	0.000000	0.000000	0.000000	0.000000	0.000000	0.000000	0.000000	0.000000	0.000000	0.000000	0.000000	0.000000	-100.000000	0.000000	0.000000	0.000000	0.000000	0.000000	0.000000	
2.960000	0.000000	0.000000	0.000000	0.000000	0.000000	0.000000	0.000000	-33.695443	0.000000	0.000000	0.000000	0.000000	0.000000	0.000000	0.000000	0.000000	0.000000	0.000000	0.000000	0.000000	0.000000	0.000000	0.000000	0.000000	0.000000	0.000000	0.000000	-100.000000	0.000000	0.000000	0.000000	0.000000	0.000000	0.000000	
2.970000	0.000000	0.000000	0.000000	0.000000	0.000000	0.000000	0.000000	-33.833791	0.000000	0.000000	0.000000	0.000000	0.000000	0.000000	0.000000	0.000000	0.000000	0.000000	0.000000	0.000000	0.000000	0.000000	0.000000	0.000000	0.000000	0.000000	0.000000	-100.000000	0.000000	0.000000	0.000000	0.000000	0.000000	0.000000	
2.980000	0.000000	0.000000	0.000000	0.000000	0.000000	0.000000	0.000000	-33.964607	0.000000	0.000000	0.000000	0.000000	0.000000	0.000000	0.000000	0.000000	0.000000	0.000000	0.000000	0.000000	0.000000	0.000000	0.000000	0.000000	0.000000	0.000000	0.000000	-100.000000	0.000000	0.000000	0.000000	0.000000	0.000000	0.000000	
2.990000	0.000000	0.000000	0.000000	0.000000	0.000000	0.000000	0.000000	-34.087837	0.000000	0.000000	0.000000	0.000000	0.000000	0.000000	0.000000	0.000000	0.000000	0.000000	0.000000	0.000000	0.000000	0.000000	0.000000	0.000000	0.000000	0.000000	0.000000	-100.000000	0.000000	0.000000	0.000000	0.000000	0.000000	0.000000	
3.000000	0.000000	0.000000	0.000000	0.000000	0.000000	0.000000	0.000000	-34.203432	0.000000	0.000000	0.000000	0.000000	0.000000	0.000000	0.000000	0.000000	0.000000	0.000000	0.000000	0.000000	0.000000	0.000000	0.000000	0.000000	0.000000	0.000000	0.000000	-100.000000	0.000000	0.000000	0.000000	0.000000	0.000000	0.000000	
3.010000	0.000000	0.000000	0.000000	0.000000	0.000000	0.000000	0.000000	-34.311347	0.000000	0.000000	0.000000	0.000000	0.000000	0.000000	0.000000	0.000000	0.000000	0.000000	0.000000	0.000000	0.000000	0.000000	0.000000	0.000000	0.000000	0.000000	0.000000	-100.000000	0.000000	0.000000	0.000000	0.000000	0.000000	0.000000	
3.020000	0.000000	0.000000	0.000000	0.000000	0.000000	0.000000	0.000000	-34.411537	0.000000	0.000000	0.000000	0.000000	0.000000	0.000000	0.000000	0.000000	0.000000	0.000000	0.000000	0.000000	0.000000	0.000000	0.000000	0.000000	0.000000	0.000000	0.000000	-100.000000	0.000000	0.000000	0.000000	0.000000	0.000000	0.000000	
3.030000	0.000000	0.000000	0.000000	0.000000	0.000000	0.000000	0.000000	-34.503964	0.000000	0.000000	0.000000	0.000000	0.000000	0.000000	0.000000	0.000000	0.000000	0.000000	0.000000	0.000000	0.000000	0.000000	0.000000	0.000000	0.000000	0.000000	0.000000	-100.000000	0.000000	0.000000	0.000000	0.000000	0.000000	0.000000	
3.040000	0.000000	0.000000	0.000000	0.000000	0.000000	0.000000	0.000000	-34.588589	0.000000	0.000000	0.000000	0.000000	0.000000	0.000000	0.000000	0.000000	0.000000	0.000000	0.000000	0.000000	0.000000	0.000000	0.000000	0.000000	0.000000	0.000000	0.000000	-100.000000	0.000000	0.000000	0.000000	0.000000	0.000000	0.000000	
3.050000	0.000000	0.000000	0.000000	0.000000	0.000000	0.000000	0.000000	-34.665380	0.000000	0.000000	0.000000	0.000000	0.000000	0.000000	0.000000	0.000000	0.000000	0.000000	0.000000	0.000000	0.000000	0.000000	0.000000	0.000000	0.000000	0.000000	0.000000	-100.000000	0.000000	0.000000	0.000000	0.000000	0.000000	0.000000	
3.060000	0.000000	0.000000	0.000000	0.000000	0.000000	0.000000	0.000000	-34.734305	0.000000	0.000000	0.000000	0.000000	0.000000	0.000000	0.000000	0.000000	0.000000	0.000000	0.000000	0.000000	0.000000	0.000000	0.000000	0.000000	0.000000	0.000000	0.000000	-100.000000	0.000000	0.000000	0.000000	0.000000	0.000000	0.000000	
3.070000	0.000000	0.000000	0.000000	0.000000	0.000000	0.000000	0.000000	-34.795337	0.000000	0.000000	0.000000	0.000000	0.000000	0.000000	0.000000	0.000000	0.000000	0.000000	0.000000	0.000000	0.000000	0.000000	0.000000	0.000000	0.000000	0.000000	0.000000	-100.000000	0.000000	0.000000	0.000000	0.000000	0.000000	0.000000	
3.080000	0.000000	0.000000	0.000000	0.000000	0.000000	0.000000	0.000000	-34.848451	0.000000	0.000000	0.000000	0.000000	0.000000	0.000000	0.000000	0.000000	0.000000	0.000000	0.000000	0.000000	0.000000	0.000000	0.000000	0.000000	0.000000	0.000000	0.000000	-100.000000	0.000000	0.000000	0.000000	0.000000	0.000000	0.000000	
3.090000	0.000000	0.000000	0.000000	0.000000	0.000000	0.000000	0.000000	-34.893626	0.000000	0.000000	0.000000	0.000000	0.000000	0.000000	0.000000	0.000000	0.000000	0.000000	0.000000	0.000000	0.000000	0.000000	0.000000	0.000000	0.000000	0.000000	0.000000	-100.000000	0.000000	0.000000	0.000000	0.000000	0.000000	0.000000	
3.100000	0.000000	0.000000	0.000000	0.000000	0.000000	0.000000	0.000000	-34.930844	0.000000	0.000000	0.000000	0.000000	0.000000	0.000000	0.000000	0.000000	0.000000	0.000000	0.000000	0.000000	0.000000	0.000000	0.000000	0.000000	0.000000	0.000000	0.000000	-100.000000	0.000000	0.000000	0.000000	0.000000	0.000000	0.000000	
3.110000	0.000000	0.000000	0.000000	0.000000	0.000000	0.000000	0.000000	-34.960091	0.000000	0.000000	0.000000	0.000000	0.000000	0.000000	0.000000	0.000000	0.000000	0.000000	0.000000	0.000000	0.000000	0.000000	0.000000	0.000000	0.000000	0.000000	0.000000	-100.000000	0.000000	0.000000	0.000000	0.000000	0.000000	0.000000	
3.120000	0.000000	0.000000	0.000000	0.000000	0.000000	0.000000	0.000000	-34.981354	0.000000	0.000000	0.000000	0.000000	0.000000	0.000000	0.000000	0.000000	0.000000	0.000000	0.000000	0.000000	0.000000	0.000000	0.000000	0.000000	0.000000	0.000000	0.000000	-100.000000	0.000000	0.000000	0.000000	0.000000	0.000000	0.000000	
3.130000	0.000000	0.000000	0.000000	0.000000	0.000000	0.000000	0.000000	-34.994625	0.000000	0.000000	0.000000	0.000000	0.000000	0.000000	0.000000	0.000000	0.000000	0.000000	0.000000	0.000000	0.000000	0.000000	0.000000	0.000000	0.000000	0.000000	0.000000	-100.000000	0.000000	0.000000	0.000000	0.000000	0.000000	0.000000	
3.140000	0.000000	0.000000	0.000000	0.000000	0.000000	0.000000	0.000000	-34.999899	0.000000	0.000000	0.000000	0.000000	0.000000	0.000000	0.000000	0.000000	0.000000	0.000000	0.000000	0.000000	0.000000	0.000000	0.000000	0.000000	0.000000	0.000000	0.000000	-100.000000	0.000000	0.000000	0.000000	0.000000	0.000000	0.000000	
