# Supplementary material for: Towards Subject-Specific Strength Training Design through Predictive Use of Musculoskeletal Models
Source: Appl Bionics Biomech. 2018 Mar 19;2018:9721079. doi: 10.1155/2018/9721079 (PMC5896361; doi:10.1155/2018/9721079)
Supplement: Supplementary Materials — The MATLAB code to generate the velocity profile as well as all the OpenSim files is available here http://www.movement.ethz.ch/data-repository.html. [file 9721079.f1.zip › Opensim setup files/SO_setups/setup_SO_flex_ext.xml]

<?xml version="1.0" encoding="utf-8"?>
<OpenSimDocument Version="30000">
   <AnalyzeTool name="Arnoldetal2010_2Legs_Default_v2.1_Thelen_Rotational_Force_flex_ext_neutral_strength.osim">
      <model_file>P:\Student\PluessM\Versuch\Versuch8_Arnold\Matlab_programme\full_motion\Arnoldetal2010_2Legs_Default_v2.1_Thelen_Rotational_Force_flex_ext_neutral_strength.osim</model_file>
      <replace_force_set>false</replace_force_set>
      <force_set_files>P:\Student\PluessM\Versuch\Versuch8_Arnold\Matlab_programme\full_motion\residual_Actuators_rotF.xml</force_set_files>
      <results_directory>P:\Student\PluessM\Versuch\Versuch8_Arnold\Matlab_programme\full_motion\rot_angle_0_neutral_test_strength_scale\SO_results\flex_ext</results_directory>
      <output_precision>8</output_precision>
      <initial_time>0</initial_time>
      <final_time>6.28</final_time>
      <solve_for_equilibrium_for_auxiliary_states>false</solve_for_equilibrium_for_auxiliary_states>
      <maximum_number_of_integrator_steps>20000</maximum_number_of_integrator_steps>
      <maximum_integrator_step_size>1</maximum_integrator_step_size>
      <minimum_integrator_step_size>1e-008</minimum_integrator_step_size>
      <integrator_error_tolerance>1e-005</integrator_error_tolerance>
      <AnalysisSet name="Analyses">
         <objects>
            <StaticOptimization name="StaticOptimization">
               <on>true</on>
               <start_time>0</start_time>
               <end_time>6.28</end_time>
               <step_interval>1</step_interval>
               <in_degrees>true</in_degrees>
               <use_model_force_set>true</use_model_force_set>
               <activation_exponent>2</activation_exponent>
               <use_muscle_physiology>true</use_muscle_physiology>
               <optimizer_convergence_criterion>0.0001</optimizer_convergence_criterion>
               <optimizer_max_iterations>100</optimizer_max_iterations>
            </StaticOptimization>
            <JointReaction name="JointReaction">
               <on>true</on>
               <start_time>0</start_time>
               <end_time>6.28</end_time>
               <step_interval>1</step_interval>
               <in_degrees>true</in_degrees>
               <forces_file/>
               <joint_names>ALL</joint_names>
               <apply_on_bodies>child</apply_on_bodies>
               <express_in_frame>ground</express_in_frame>
            </JointReaction>
         </objects>
         <groups/>
      </AnalysisSet>
      <ControllerSet name="Controllers">
         <objects/>
         <groups/>
      </ControllerSet>
      <external_loads_file>P:\Student\PluessM\Versuch\Versuch8_Arnold\Matlab_programme\full_motion\rot_angle_0_neutral_test_strength_scale\ext_f_setups\setup_ext_force_flex_ext.xml</external_loads_file>
      <states_file/>
      <coordinates_file>P:\Student\PluessM\Versuch\Versuch8_Arnold\Matlab_programme\full_motion\rot_angle_0_neutral_test_strength_scale\kinematik_cable_flex_ext_neutral.mot</coordinates_file>
      <speeds_file/>
      <lowpass_cutoff_frequency_for_coordinates>6</lowpass_cutoff_frequency_for_coordinates>
   </AnalyzeTool>
</OpenSimDocument>
